# Supplementary material
Source: Copernicus journal article supplement (doi:10.5194/tc-20-2923-2026)
Supplement: Supplementary file 1 [file Supplement1_Images_Description_compressed.pdf › Supplement1_Images_Description_compressed.pdf]

# Supplement of "Simulating liquid water distribution at the pore scale in snow: water retention curves and effective transport properties"

Lisa Bouvet<sup>1,2</sup>, Nicolas Allet<sup>1,2</sup>, Neige Calonne<sup>1</sup>, Frédéric Flin<sup>1</sup>, and Christian Geindreau<sup>2</sup>

<sup>1</sup>Univ. Grenoble Alpes, Université de Toulouse, Météo-France, CNRS, CNRM, Centre d'Études de la Neige, Grenoble, France

<sup>2</sup>Université Grenoble Alpes, CNRS, Grenoble INP, 3SR, Grenoble, France

## Description

The 34 images of the dataset used in this study are presented hereafter.

A first table, p. 2, lists all the images of the dataset, together with their snow type (Fierz et al., 2009), their provenance and/or main preparation procedure, and a reference where more information on the image can be obtained.

A second table, p. 3, provides the side length (in number of voxels) and pixel size (in  $\mu\text{m}$ ) of the cubic volumes, together with the main properties of the sample: density  $\rho$  ( $\text{kg m}^{-3}$ ), specific surface area SSA ( $\text{m}^2 \text{kg}^{-1}$ ), equivalent grain diameter  $d$  (mm), mean value of the mean curvature  $\overline{MC}$  ( $\text{mm}^{-1}$ ) and interquartile range of the mean curvature  $\text{IQR}_{MC}$  ( $\text{mm}^{-1}$ ).

From p. 4 to 37, each image is presented in details, with a property table, downward and upward views, and a mean curvature histogram.

**Table S1.** List of the 34 images used in this study.

| Image | Snow type | Comment                                                                                                                  | Main reference          |
|-------|-----------|--------------------------------------------------------------------------------------------------------------------------|-------------------------|
| fr    | PP        | Sampled at Col de Porte (1325 m altitude, Chartreuse range, France), 14 February 2002.                                   | Calonne et al. (2011)   |
| I01   | PP        | Sampled at Col de Porte (1325 m altitude, Chartreuse range, France), 15 h after the snowfall.                            | Flin et al. (2004)      |
| I03   | PP        | 62 h after the snowfall, under isothermal conditions at $-2^{\circ}\text{C}$ .                                           | Flin et al. (2004)      |
| I04   | PP        | 81 h after the snowfall, under isothermal conditions at $-2^{\circ}\text{C}$ .                                           | Flin et al. (2004)      |
| I08   | DF        | 297 h after the snowfall, under isothermal conditions at $-2^{\circ}\text{C}$ .                                          | Flin et al. (2004)      |
| I15   | RG        | 806 h after the snowfall, under isothermal conditions at $-2^{\circ}\text{C}$ .                                          | Flin et al. (2004)      |
| I19   | RG        | 1381 h after the snowfall, under isothermal conditions at $-2^{\circ}\text{C}$ .                                         | Flin et al. (2004)      |
| I21   | RG        | 1694 h after the snowfall, under isothermal conditions at $-2^{\circ}\text{C}$ .                                         | Flin et al. (2004)      |
| I23   | RG        | 2026 h after the snowfall, under isothermal conditions at $-2^{\circ}\text{C}$ .                                         | Flin et al. (2004)      |
| P03   | PP        | Girose glacier (3200 m altitude, Ecrins range, France), 20 cm depth, 17 March 2009.                                      | Flin et al. (2011)      |
| P04   | DF        | Girose glacier (3200 m altitude, Ecrins range, France), 40 cm depth, 17 March 2009.                                      | Flin et al. (2011)      |
| P06   | RG        | Girose glacier (3200 m altitude, Ecrins range, France), 60 cm depth, 17 March 2009.                                      | Flin et al. (2011)      |
| P07   | RG        | Girose glacier (3200 m altitude, Ecrins range, France), 70 cm depth, 17 March 2009.                                      | Flin et al. (2011)      |
| P08   | RG        | Girose glacier (3200 m altitude, Ecrins range, France), 100 cm depth, 17 March 2009.                                     | Flin et al. (2011)      |
| P09   | RG        | Girose glacier (3200 m altitude, Ecrins range, France), 120 cm depth, 17 March 2009.                                     | Flin et al. (2011)      |
| P10   | RG        | Girose glacier (3200 m altitude, Ecrins range, France), 165 cm depth, 17 March 2009.                                     | Flin et al. (2011)      |
| P11   | RG        | Girose glacier (3200 m altitude, Ecrins range, France), 65 cm depth, 1 March 2009.                                       | Flin et al. (2011)      |
| P14   | RG        | Girose glacier (3200 m altitude, Ecrins range, France), 80 cm depth, 1 March 2009.                                       | Flin et al. (2011)      |
| P15   | RG        | Girose glacier (3200 m altitude, Ecrins range, France), 170 cm depth, 1 March 2009.                                      | Flin et al. (2011)      |
| NH0   | RG        | Sieved snow, followed by isothermal conditions.                                                                          | Flin et al. (2011)      |
| NH1   | MF        | Grain coarsening of water-saturated snow and drainage after 1h.                                                          | Flin et al. (2011)      |
| NH12  | MF        | Grain coarsening of water-saturated snow and drainage after 6h.                                                          | Flin et al. (2011)      |
| NH2   | MF        | Grain coarsening of water-saturated snow and drainage after 24h.                                                         | Flin et al. (2011)      |
| NH5   | MF        | Grain coarsening of water-saturated snow and drainage after 142h.                                                        | Flin et al. (2011)      |
| cham  | MF        | Grain coarsening of water-saturated snow and drainage.                                                                   | Coléou et al. (2001)    |
| E2b   | FC        | 3 weeks under a $TG = 16 \text{ K m}^{-1}$ , $T \text{ mean} = -3^{\circ}\text{C}$ , sampled in the middle of the layer. | Flin and Brzoska (2008) |
| 0A    | RG        | Sieved snow, followed by isothermal conditions.                                                                          | Calonne et al. (2014)   |
| 1A    | RG        | 3 days under a $TG = 43 \text{ K m}^{-1}$ , $T \text{ mean} = -4^{\circ}\text{C}$ , sampled in the middle of the layer.  | Calonne et al. (2014)   |
| 2A    | FC        | 6 days under a $TG = 43 \text{ K m}^{-1}$ , $T \text{ mean} = -4^{\circ}\text{C}$ , sampled in the middle of the layer.  | Calonne et al. (2014)   |
| 3A    | DH        | 9 days under a $TG = 43 \text{ K m}^{-1}$ , $T \text{ mean} = -4^{\circ}\text{C}$ , sampled in the middle of the layer.  | Calonne et al. (2014)   |
| 4A    | DH        | 13 days under a $TG = 43 \text{ K m}^{-1}$ , $T \text{ mean} = -4^{\circ}\text{C}$ , sampled in the middle of the layer. | Calonne et al. (2014)   |
| 5A    | DH        | 17 days under a $TG = 43 \text{ K m}^{-1}$ , $T \text{ mean} = -4^{\circ}\text{C}$ , sampled in the middle of the layer. | Calonne et al. (2014)   |
| 7A    | DH        | 21 days under a $TG = 43 \text{ K m}^{-1}$ , $T \text{ mean} = -4^{\circ}\text{C}$ , sampled in the middle of the layer. | Calonne et al. (2014)   |
| grad3 | DH        | 8 days under a $TG = 100 \text{ K m}^{-1}$ , $T \text{ mean} = -5^{\circ}\text{C}$ .                                     | Coléou et al. (2001)    |

**Table S2.** Properties of the 34 images used in this study.

| Image | Snow type | Image size (voxel) | Pixel size ( $\mu\text{m}$ ) | $\rho$ ( $\text{kg m}^{-3}$ ) | SSA ( $\text{m}^2 \text{kg}^{-1}$ ) | $d$ (mm) | $\overline{\text{MC}}$ ( $\text{mm}^{-1}$ ) | $\text{IQR}_{\text{MC}}$ ( $\text{mm}^{-1}$ ) |
|-------|-----------|--------------------|------------------------------|-------------------------------|-------------------------------------|----------|---------------------------------------------|-----------------------------------------------|
| fr    | PP        | 1192               | 4.910                        | 124.88                        | 55.30                               | 0.1183   | 8.07                                        | 21.83                                         |
| I01   | PP        | 512                | 4.910                        | 102.90                        | 55.79                               | 0.1173   | 8.19                                        | 17.45                                         |
| I03   | PP        | 600                | 4.910                        | 123.31                        | 41.37                               | 0.1581   | 6.08                                        | 13.18                                         |
| I04   | PP        | 600                | 4.910                        | 113.44                        | 42.48                               | 0.1540   | 6.49                                        | 13.03                                         |
| I08   | DF        | 512                | 4.910                        | 147.71                        | 29.32                               | 0.2232   | 5.27                                        | 8.80                                          |
| I15   | RG        | 600                | 4.910                        | 172.74                        | 23.32                               | 0.2805   | 4.10                                        | 6.54                                          |
| I19   | RG        | 600                | 4.910                        | 192.47                        | 19.90                               | 0.3288   | 3.47                                        | 5.80                                          |
| I21   | RG        | 600                | 4.910                        | 198.64                        | 19.23                               | 0.3402   | 3.28                                        | 5.58                                          |
| I23   | RG        | 512                | 4.910                        | 256.28                        | 17.24                               | 0.3804   | 2.54                                        | 4.75                                          |
| P03   | PP        | 512                | 8.480                        | 134.60                        | 50.91                               | 0.1285   | 13.16                                       | 14.99                                         |
| P04   | DF        | 512                | 8.588                        | 157.58                        | 25.36                               | 0.2580   | 5.10                                        | 7.08                                          |
| P06   | RG        | 512                | 6.158                        | 354.51                        | 21.59                               | 0.3031   | 3.30                                        | 6.45                                          |
| P07   | RG        | 512                | 8.609                        | 280.07                        | 17.15                               | 0.3816   | 3.01                                        | 5.29                                          |
| P08   | RG        | 512                | 8.552                        | 378.96                        | 14.57                               | 0.4490   | 1.85                                        | 4.84                                          |
| P09   | RG        | 512                | 6.158                        | 396.13                        | 12.29                               | 0.5325   | 1.61                                        | 5.15                                          |
| P10   | RG        | 512                | 6.103                        | 396.07                        | 10.46                               | 0.6253   | 1.25                                        | 4.78                                          |
| P11   | RG        | 512                | 8.588                        | 413.71                        | 20.76                               | 0.3151   | 3.13                                        | 7.18                                          |
| P14   | RG        | 600                | 6.154                        | 359.84                        | 18.13                               | 0.3608   | 2.35                                        | 6.86                                          |
| P15   | RG        | 512                | 6.158                        | 315.50                        | 16.09                               | 0.4067   | 2.65                                        | 5.65                                          |
| NH0   | RG        | 651                | 8.609                        | 430.59                        | 17.34                               | 0.3773   | 2.37                                        | 6.61                                          |
| NH1   | MF        | 651                | 8.609                        | 544.08                        | 6.99                                | 0.9363   | -0.05                                       | 8.10                                          |
| NH12  | MF        | 651                | 8.590                        | 512.89                        | 7.69                                | 0.8514   | 0.14                                        | 6.82                                          |
| NH2   | MF        | 651                | 8.590                        | 502.60                        | 6.18                                | 1.0584   | 0.31                                        | 5.15                                          |
| NH5   | MF        | 1000               | 9.460                        | 472.83                        | 3.78                                | 1.7302   | 0.35                                        | 3.08                                          |
| cham  | MF        | 542                | 10.000                       | 522.31                        | 8.49                                | 0.7702   | 0.13                                        | 6.90                                          |
| E2b   | FC        | 1200               | 4.910                        | 262.74                        | 15.43                               | 0.4240   | 1.99                                        | 7.64                                          |
| 0A    | RG        | 700                | 8.392                        | 314.83                        | 27.68                               | 0.2367   | 4.87                                        | 9.38                                          |
| 1A    | RG        | 700                | 8.395                        | 275.04                        | 23.37                               | 0.2800   | 4.67                                        | 9.17                                          |
| 2A    | FC        | 700                | 8.373                        | 282.70                        | 20.75                               | 0.3154   | 3.53                                        | 9.03                                          |
| 3A    | DH        | 700                | 8.400                        | 274.79                        | 18.18                               | 0.3600   | 2.65                                        | 8.52                                          |
| 4A    | DH        | 700                | 8.397                        | 315.31                        | 15.19                               | 0.4309   | 1.34                                        | 7.61                                          |
| 5A    | DH        | 1000               | 9.655                        | 286.12                        | 14.89                               | 0.4395   | 1.65                                        | 7.75                                          |
| 7A    | DH        | 950                | 9.672                        | 309.95                        | 13.42                               | 0.4882   | 1.05                                        | 7.87                                          |
| grad3 | DH        | 600                | 10.000                       | 369.20                        | 21.84                               | 0.2996   | 0.76                                        | 11.32                                         |

Image fr

Table S3.

| Snow type | Image size (voxel) | Pixel size ( $\mu\text{m}$ ) | $\rho$ ( $\text{kg m}^{-3}$ ) | SSA ( $\text{m}^2 \text{kg}^{-1}$ ) | $d$ (mm) | $\overline{\text{MC}}$ ( $\text{mm}^{-1}$ ) | $\text{IQR}_{\text{MC}}$ ( $\text{mm}^{-1}$ ) |
|-----------|--------------------|------------------------------|-------------------------------|-------------------------------------|----------|---------------------------------------------|-----------------------------------------------|
| PP        | 1192               | 4.910                        | 124.88                        | 55.30                               | 0.1183   | 8.07                                        | 21.83                                         |

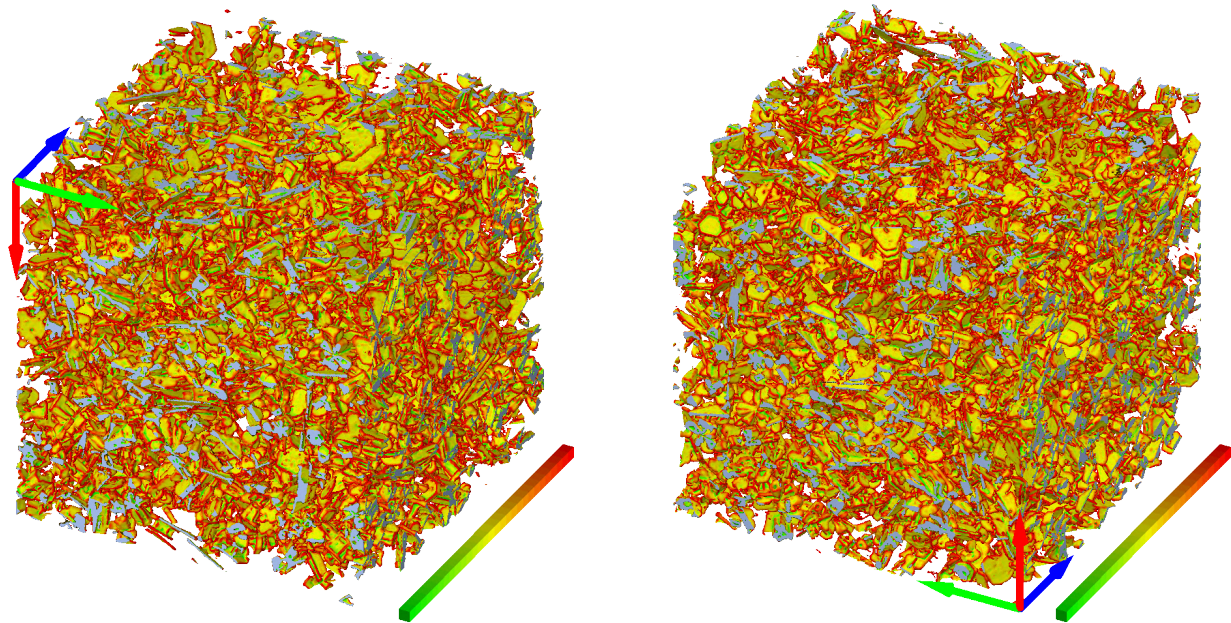

**Figure S1.** Downward (left) and upward (right) views of the whole image volume, where the mean local curvature is represented in each point of the surface. Concave surfaces are shown in green, convex surfaces in red, and flat surfaces in yellow (see colorbars from  $-30$  to  $+30 \text{ mm}^{-1}$ ). The side of each viewing cube amounts to  $5.85 \text{ mm}$ . The blue, green, and red arrows, correspond to the  $x$ ,  $y$ , and  $z$  coordinate axes, respectively.

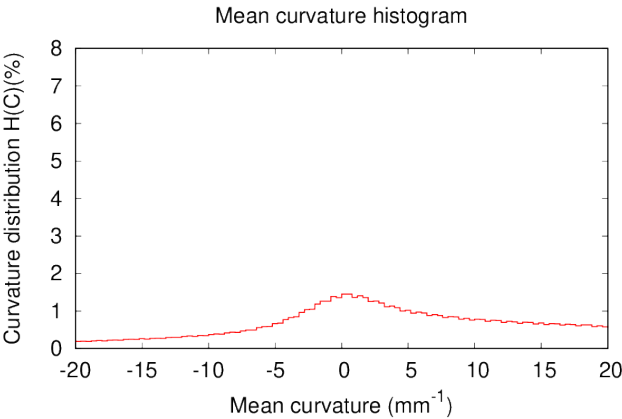

**Figure S2.** Mean curvature distribution on the whole image, from  $-20$  to  $+20 \text{ mm}^{-1}$ . Each bin is  $0.4 \text{ mm}^{-1}$  wide.



Image I01

Table S4.

| Snow type | Image size (voxel) | Pixel size ( $\mu\text{m}$ ) | $\rho$ ( $\text{kg m}^{-3}$ ) | SSA ( $\text{m}^2 \text{kg}^{-1}$ ) | $d$ (mm) | $\overline{\text{MC}}$ ( $\text{mm}^{-1}$ ) | $\text{IQR}_{\text{MC}}$ ( $\text{mm}^{-1}$ ) |
|-----------|--------------------|------------------------------|-------------------------------|-------------------------------------|----------|---------------------------------------------|-----------------------------------------------|
| PP        | 512                | 4.910                        | 102.90                        | 55.79                               | 0.1173   | 8.19                                        | 17.45                                         |

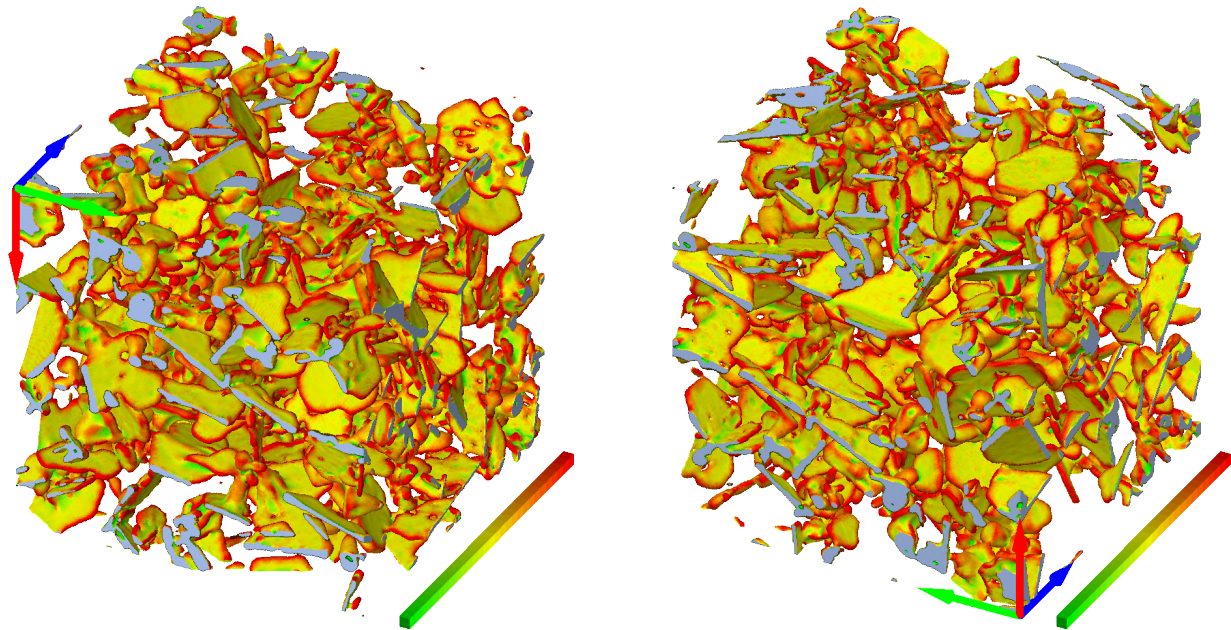

**Figure S3.** Downward (left) and upward (right) views of the whole image volume, where the mean local curvature is represented in each point of the surface. Concave surfaces are shown in green, convex surfaces in red, and flat surfaces in yellow (see colorbars from  $-30$  to  $+30 \text{ mm}^{-1}$ ). The side of each viewing cube amounts to  $2.51 \text{ mm}$ . The blue, green, and red arrows, correspond to the  $x$ ,  $y$ , and  $z$  coordinate axes, respectively.

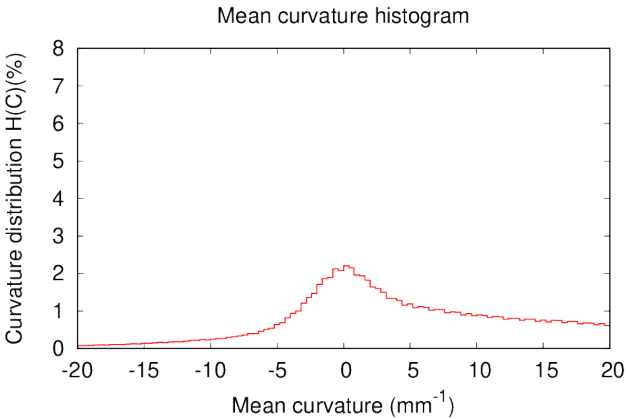

**Figure S4.** Mean curvature distribution on the whole image, from  $-20$  to  $+20 \text{ mm}^{-1}$ . Each bin is  $0.4 \text{ mm}^{-1}$  wide.

Image I03

Table S5.

| Snow type | Image size (voxel) | Pixel size ( $\mu\text{m}$ ) | $\rho$ ( $\text{kg m}^{-3}$ ) | SSA ( $\text{m}^2 \text{kg}^{-1}$ ) | $d$ (mm) | $\overline{\text{MC}}$ ( $\text{mm}^{-1}$ ) | $\text{IQR}_{\text{MC}}$ ( $\text{mm}^{-1}$ ) |
|-----------|--------------------|------------------------------|-------------------------------|-------------------------------------|----------|---------------------------------------------|-----------------------------------------------|
| PP        | 600                | 4.910                        | 123.31                        | 41.37                               | 0.1581   | 6.08                                        | 13.18                                         |

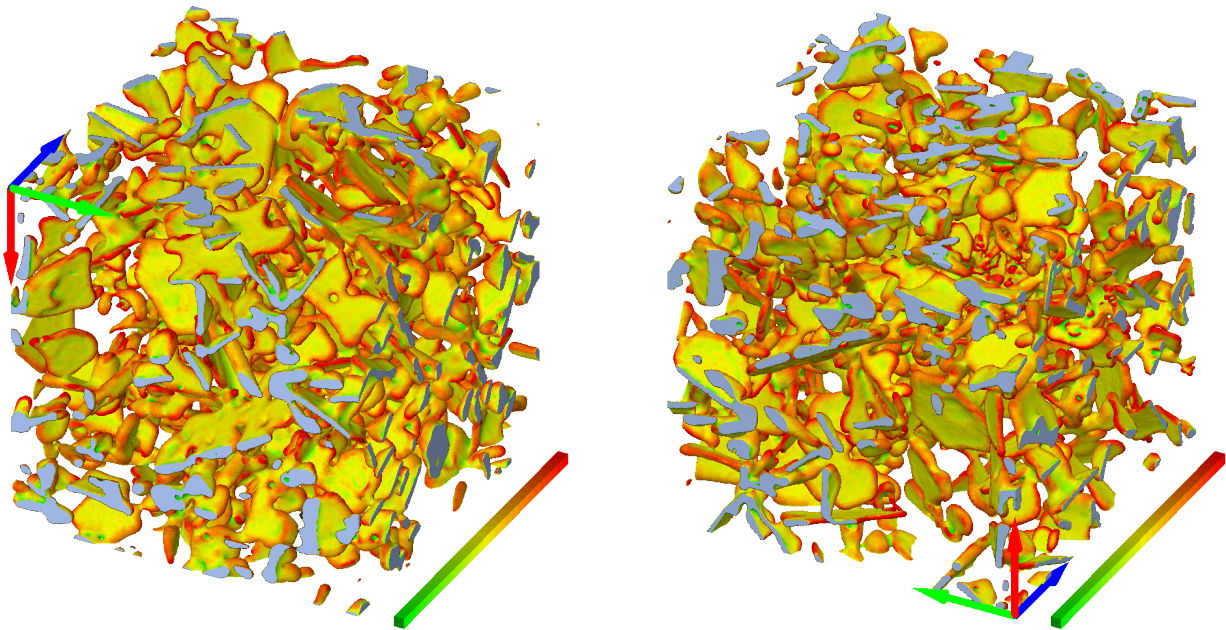

**Figure S5.** Downward (left) and upward (right) views of the whole image volume, where the mean local curvature is represented in each point of the surface. Concave surfaces are shown in green, convex surfaces in red, and flat surfaces in yellow (see colorbars from  $-30$  to  $+30 \text{ mm}^{-1}$ ). The side of each viewing cube amounts to  $2.95 \text{ mm}$ . The blue, green, and red arrows, correspond to the  $x$ ,  $y$ , and  $z$  coordinate axes, respectively.

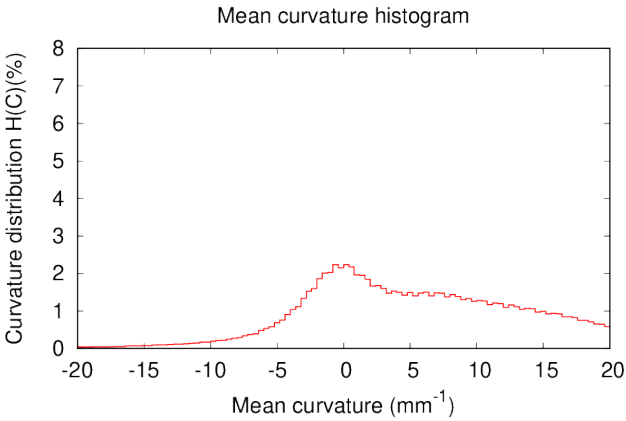

**Figure S6.** Mean curvature distribution on the whole image, from  $-20$  to  $+20 \text{ mm}^{-1}$ . Each bin is  $0.4 \text{ mm}^{-1}$  wide.

Image I04

Table S6.

| Snow type | Image size (voxel) | Pixel size ( $\mu\text{m}$ ) | $\rho$ ( $\text{kg m}^{-3}$ ) | SSA ( $\text{m}^2 \text{kg}^{-1}$ ) | $d$ (mm) | $\overline{\text{MC}}$ ( $\text{mm}^{-1}$ ) | $\text{IQR}_{\text{MC}}$ ( $\text{mm}^{-1}$ ) |
|-----------|--------------------|------------------------------|-------------------------------|-------------------------------------|----------|---------------------------------------------|-----------------------------------------------|
| PP        | 600                | 4.910                        | 113.44                        | 42.48                               | 0.1540   | 6.49                                        | 13.03                                         |

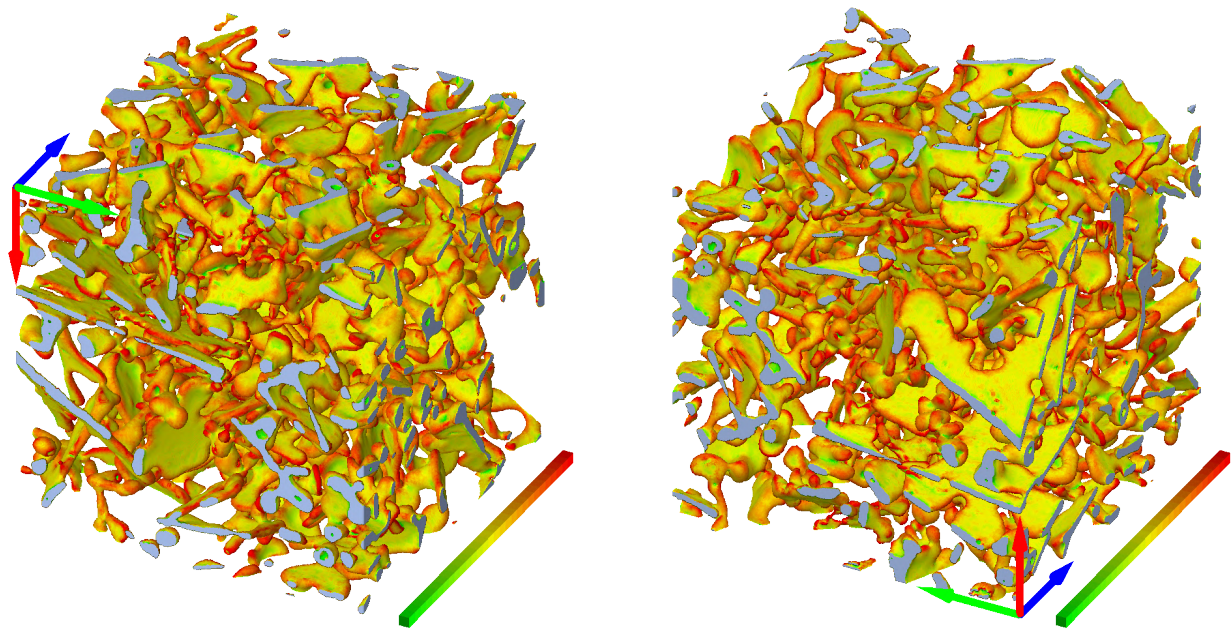

**Figure S7.** Downward (left) and upward (right) views of the whole image volume, where the mean local curvature is represented in each point of the surface. Concave surfaces are shown in green, convex surfaces in red, and flat surfaces in yellow (see colorbars from  $-30$  to  $+30 \text{ mm}^{-1}$ ). The side of each viewing cube amounts to  $2.95 \text{ mm}$ . The blue, green, and red arrows, correspond to the  $x$ ,  $y$ , and  $z$  coordinate axes, respectively.

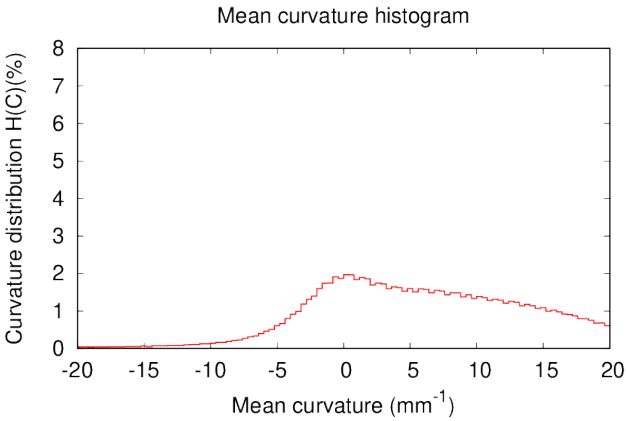

**Figure S8.** Mean curvature distribution on the whole image, from  $-20$  to  $+20 \text{ mm}^{-1}$ . Each bin is  $0.4 \text{ mm}^{-1}$  wide.

Image I08

Table S7.

| Snow type | Image size (voxel) | Pixel size ( $\mu\text{m}$ ) | $\rho$ ( $\text{kg m}^{-3}$ ) | SSA ( $\text{m}^2 \text{kg}^{-1}$ ) | $d$ (mm) | $\overline{\text{MC}}$ ( $\text{mm}^{-1}$ ) | $\text{IQR}_{\text{MC}}$ ( $\text{mm}^{-1}$ ) |
|-----------|--------------------|------------------------------|-------------------------------|-------------------------------------|----------|---------------------------------------------|-----------------------------------------------|
| DF        | 512                | 4.910                        | 147.71                        | 29.32                               | 0.2232   | 5.27                                        | 8.80                                          |

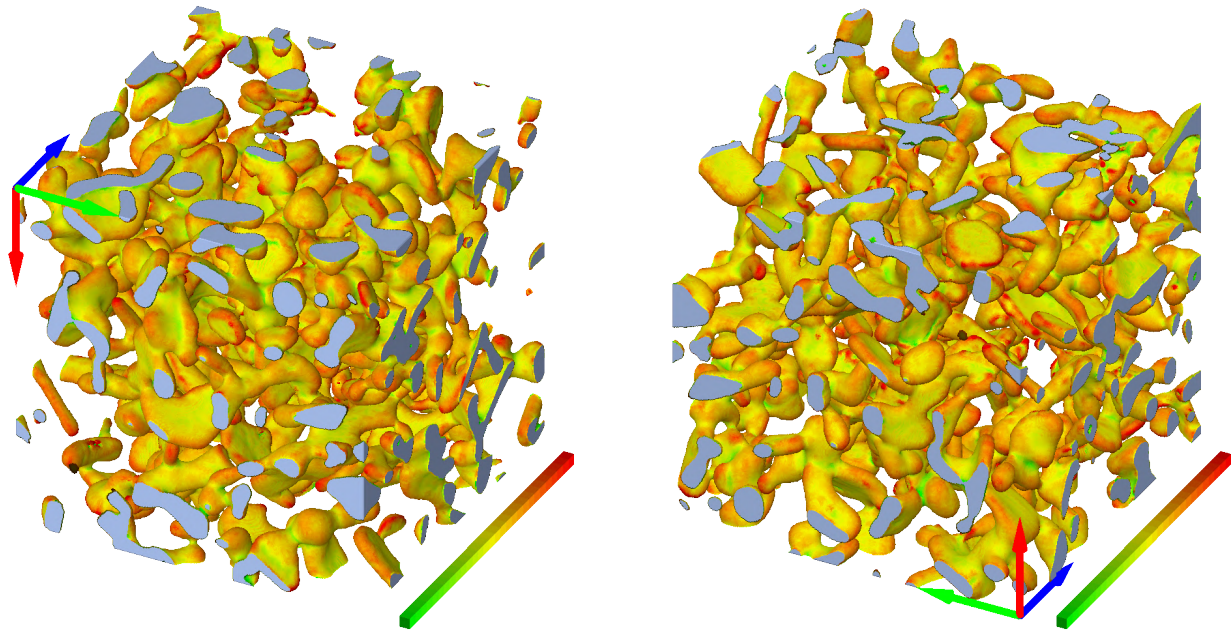

**Figure S9.** Downward (left) and upward (right) views of the whole image volume, where the mean local curvature is represented in each point of the surface. Concave surfaces are shown in green, convex surfaces in red, and flat surfaces in yellow (see colorbars from  $-30$  to  $+30 \text{ mm}^{-1}$ ). The side of each viewing cube amounts to  $2.51 \text{ mm}$ . The blue, green, and red arrows, correspond to the  $x$ ,  $y$ , and  $z$  coordinate axes, respectively.

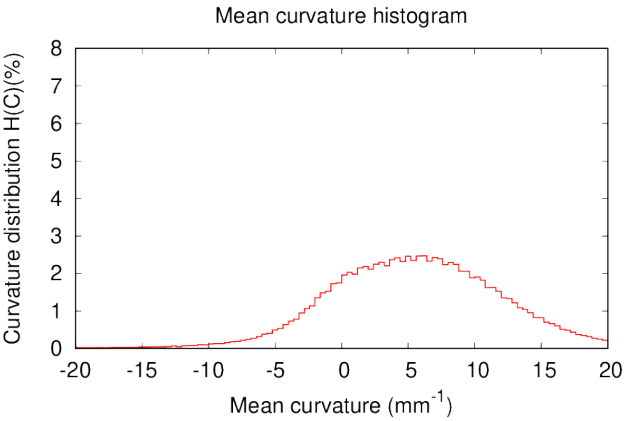

**Figure S10.** Mean curvature distribution on the whole image, from  $-20$  to  $+20 \text{ mm}^{-1}$ . Each bin is  $0.4 \text{ mm}^{-1}$  wide.



Image I15

Table S8.

| Snow type | Image size (voxel) | Pixel size ( $\mu\text{m}$ ) | $\rho$ ( $\text{kg m}^{-3}$ ) | SSA ( $\text{m}^2 \text{kg}^{-1}$ ) | $d$ (mm) | $\overline{\text{MC}}$ ( $\text{mm}^{-1}$ ) | $\text{IQR}_{\text{MC}}$ ( $\text{mm}^{-1}$ ) |
|-----------|--------------------|------------------------------|-------------------------------|-------------------------------------|----------|---------------------------------------------|-----------------------------------------------|
| RG        | 600                | 4.910                        | 172.74                        | 23.32                               | 0.2805   | 4.10                                        | 6.54                                          |

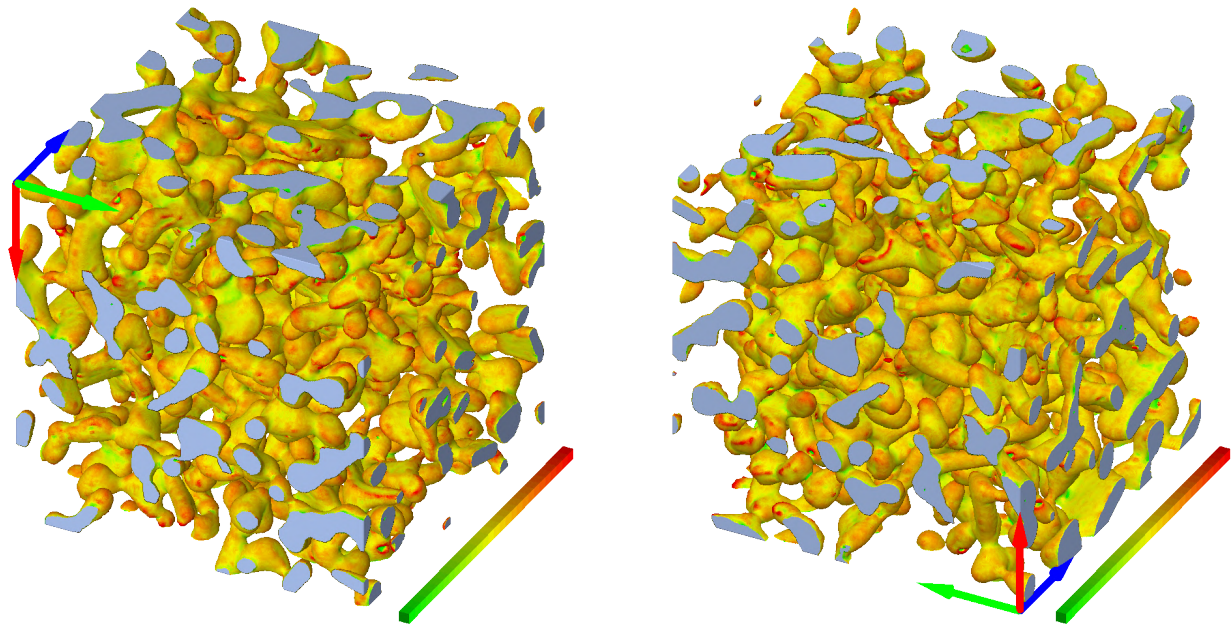

**Figure S11.** Downward (left) and upward (right) views of the whole image volume, where the mean local curvature is represented in each point of the surface. Concave surfaces are shown in green, convex surfaces in red, and flat surfaces in yellow (see colorbars from  $-30$  to  $+30 \text{ mm}^{-1}$ ). The side of each viewing cube amounts to  $2.95 \text{ mm}$ . The blue, green, and red arrows, correspond to the  $x$ ,  $y$ , and  $z$  coordinate axes, respectively.

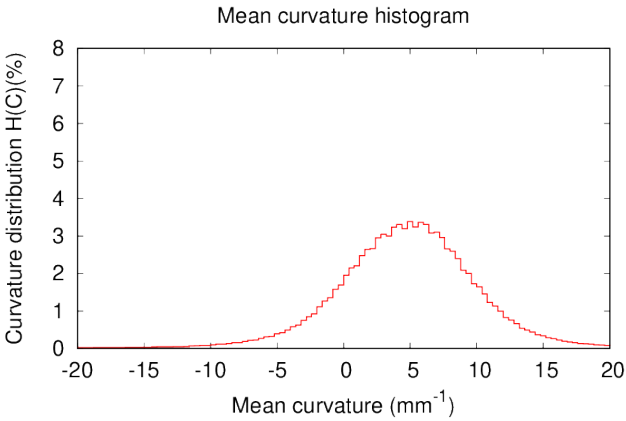

**Figure S12.** Mean curvature distribution on the whole image, from  $-20$  to  $+20 \text{ mm}^{-1}$ . Each bin is  $0.4 \text{ mm}^{-1}$  wide.

Image I19

Table S9.

| Snow type | Image size (voxel) | Pixel size ( $\mu\text{m}$ ) | $\rho$ ( $\text{kg m}^{-3}$ ) | SSA ( $\text{m}^2 \text{kg}^{-1}$ ) | $d$ (mm) | $\overline{\text{MC}}$ ( $\text{mm}^{-1}$ ) | $\text{IQR}_{\text{MC}}$ ( $\text{mm}^{-1}$ ) |
|-----------|--------------------|------------------------------|-------------------------------|-------------------------------------|----------|---------------------------------------------|-----------------------------------------------|
| RG        | 600                | 4.910                        | 192.47                        | 19.90                               | 0.3288   | 3.47                                        | 5.80                                          |

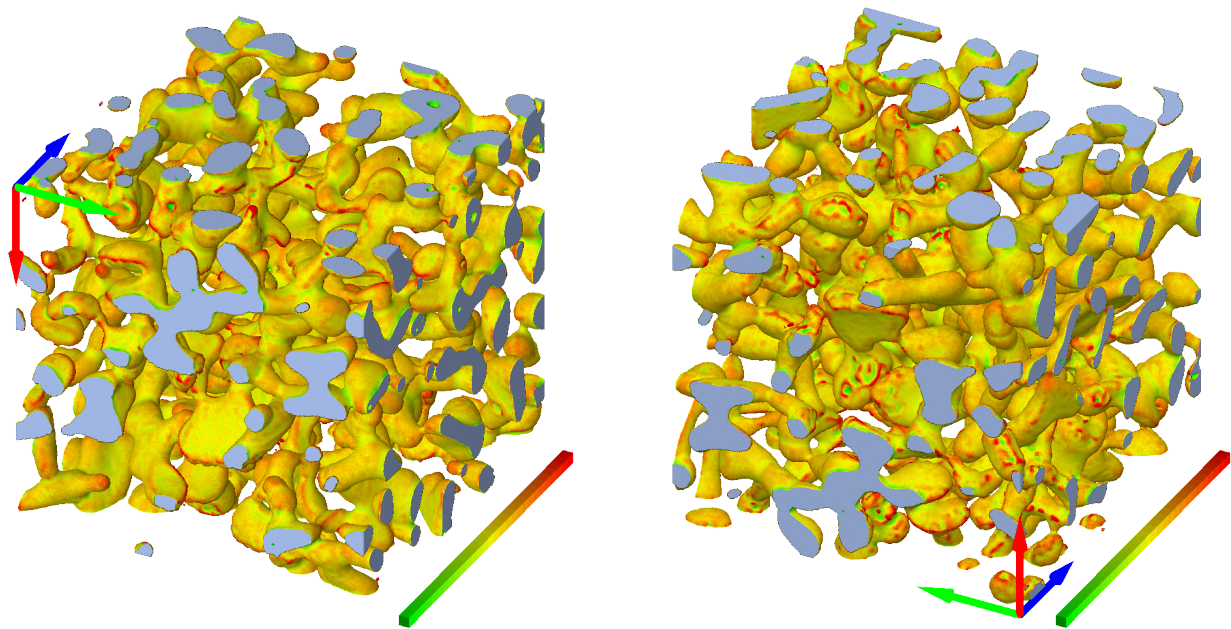

**Figure S13.** Downward (left) and upward (right) views of the whole image volume, where the mean local curvature is represented in each point of the surface. Concave surfaces are shown in green, convex surfaces in red, and flat surfaces in yellow (see colorbars from  $-30$  to  $+30 \text{ mm}^{-1}$ ). The side of each viewing cube amounts to  $2.95 \text{ mm}$ . The blue, green, and red arrows, correspond to the  $x$ ,  $y$ , and  $z$  coordinate axes, respectively.

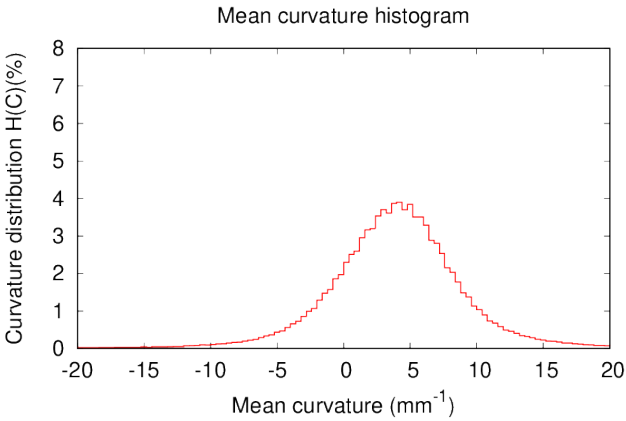

**Figure S14.** Mean curvature distribution on the whole image, from  $-20$  to  $+20 \text{ mm}^{-1}$ . Each bin is  $0.4 \text{ mm}^{-1}$  wide.

Image I21

Table S10.

| Snow type | Image size (voxel) | Pixel size ( $\mu\text{m}$ ) | $\rho$ ( $\text{kg m}^{-3}$ ) | SSA ( $\text{m}^2 \text{kg}^{-1}$ ) | $d$ (mm) | $\overline{\text{MC}}$ ( $\text{mm}^{-1}$ ) | $\text{IQR}_{\text{MC}}$ ( $\text{mm}^{-1}$ ) |
|-----------|--------------------|------------------------------|-------------------------------|-------------------------------------|----------|---------------------------------------------|-----------------------------------------------|
| RG        | 600                | 4.910                        | 198.64                        | 19.23                               | 0.3402   | 3.28                                        | 5.58                                          |

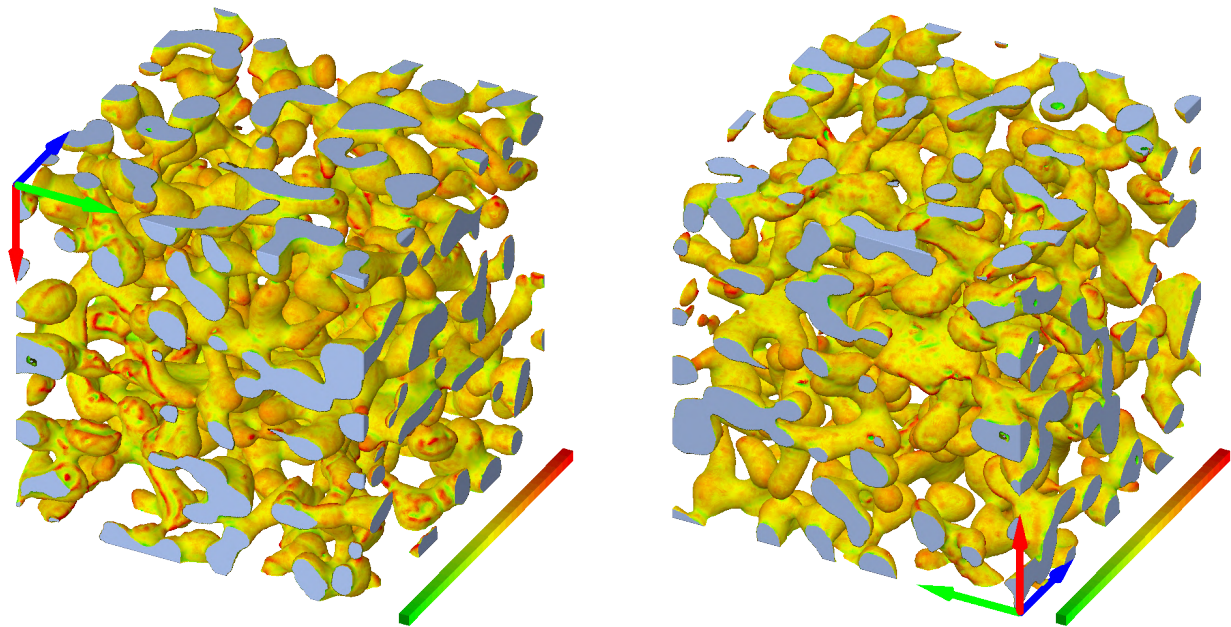

**Figure S15.** Downward (left) and upward (right) views of the whole image volume, where the mean local curvature is represented in each point of the surface. Concave surfaces are shown in green, convex surfaces in red, and flat surfaces in yellow (see colorbars from  $-30$  to  $+30 \text{ mm}^{-1}$ ). The side of each viewing cube amounts to  $2.95 \text{ mm}$ . The blue, green, and red arrows, correspond to the  $x$ ,  $y$ , and  $z$  coordinate axes, respectively.

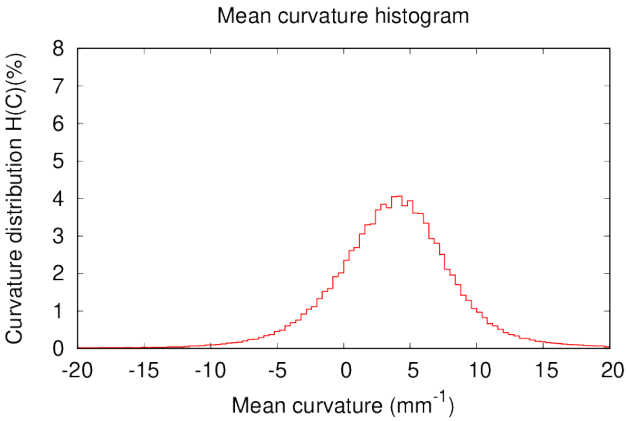

**Figure S16.** Mean curvature distribution on the whole image, from  $-20$  to  $+20 \text{ mm}^{-1}$ . Each bin is  $0.4 \text{ mm}^{-1}$  wide.

Image I23

Table S11.

| Snow type | Image size (voxel) | Pixel size ( $\mu\text{m}$ ) | $\rho$ ( $\text{kg m}^{-3}$ ) | SSA ( $\text{m}^2 \text{kg}^{-1}$ ) | $d$ (mm) | $\overline{\text{MC}}$ ( $\text{mm}^{-1}$ ) | $\text{IQR}_{\text{MC}}$ ( $\text{mm}^{-1}$ ) |
|-----------|--------------------|------------------------------|-------------------------------|-------------------------------------|----------|---------------------------------------------|-----------------------------------------------|
| RG        | 512                | 4.910                        | 256.28                        | 17.24                               | 0.3804   | 2.54                                        | 4.75                                          |

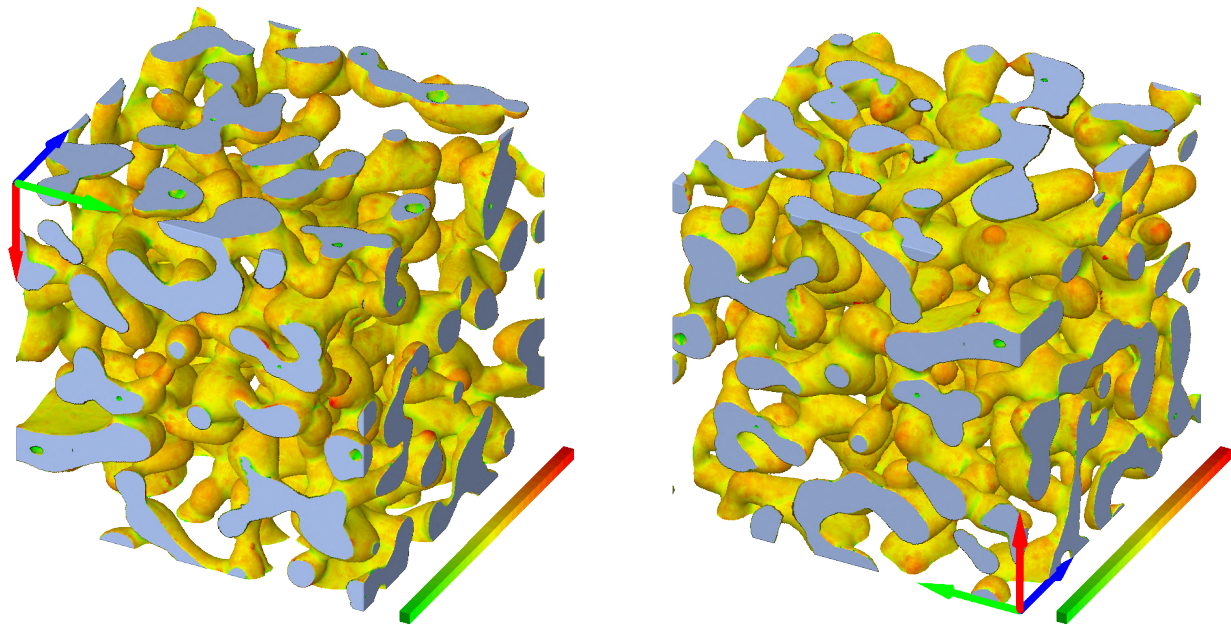

**Figure S17.** Downward (left) and upward (right) views of the whole image volume, where the mean local curvature is represented in each point of the surface. Concave surfaces are shown in green, convex surfaces in red, and flat surfaces in yellow (see colorbars from  $-30$  to  $+30 \text{ mm}^{-1}$ ). The side of each viewing cube amounts to  $2.51 \text{ mm}$ . The blue, green, and red arrows, correspond to the  $x$ ,  $y$ , and  $z$  coordinate axes, respectively.

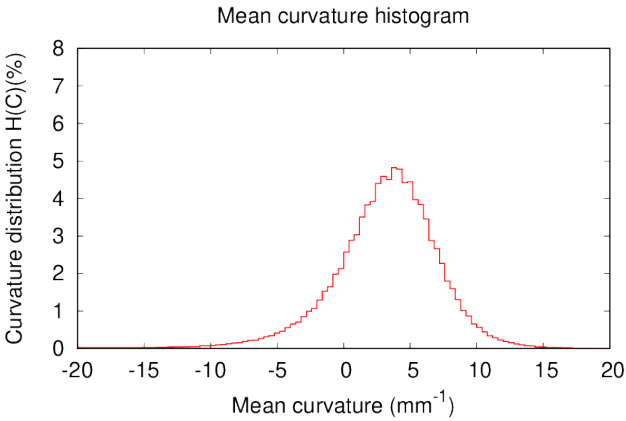

**Figure S18.** Mean curvature distribution on the whole image, from  $-20$  to  $+20 \text{ mm}^{-1}$ . Each bin is  $0.4 \text{ mm}^{-1}$  wide.



Table S12.

| Snow type | Image size (voxel) | Pixel size ( $\mu\text{m}$ ) | $\rho$ ( $\text{kg m}^{-3}$ ) | SSA ( $\text{m}^2 \text{kg}^{-1}$ ) | $d$ (mm) | $\overline{\text{MC}}$ ( $\text{mm}^{-1}$ ) | $\text{IQR}_{\text{MC}}$ ( $\text{mm}^{-1}$ ) |
|-----------|--------------------|------------------------------|-------------------------------|-------------------------------------|----------|---------------------------------------------|-----------------------------------------------|
| PP        | 512                | 8.480                        | 134.60                        | 50.91                               | 0.1285   | 13.16                                       | 14.99                                         |

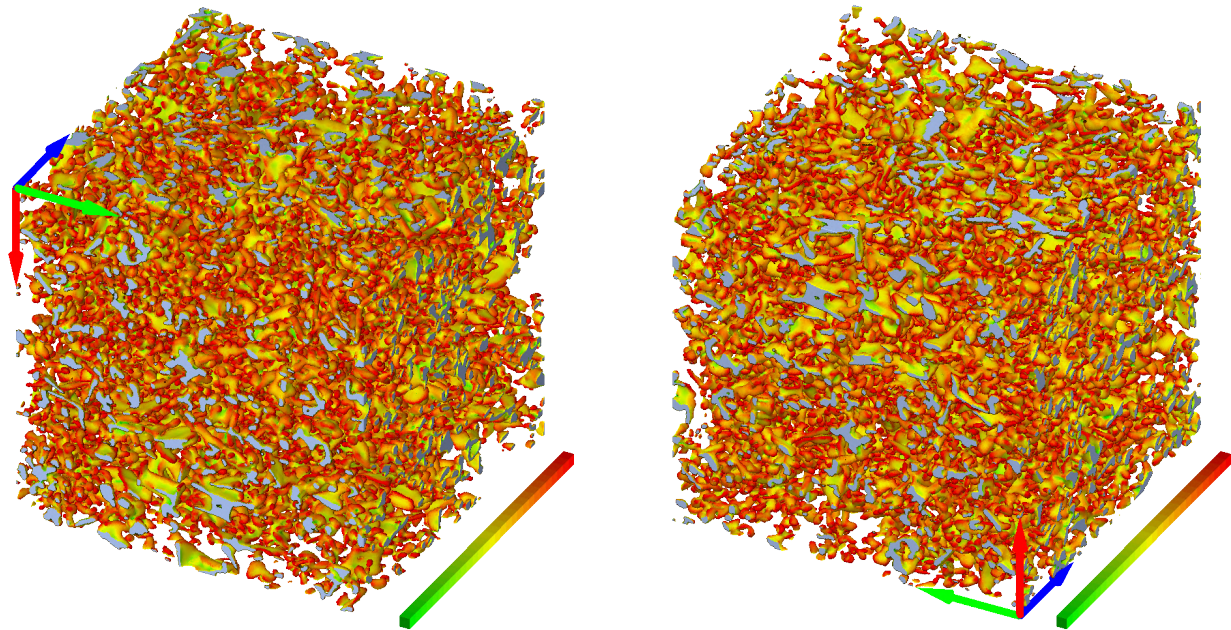

**Figure S19.** Downward (left) and upward (right) views of the whole image volume, where the mean local curvature is represented in each point of the surface. Concave surfaces are shown in green, convex surfaces in red, and flat surfaces in yellow (see colorbars from  $-30$  to  $+30 \text{ mm}^{-1}$ ). The side of each viewing cube amounts to  $4.34 \text{ mm}$ . The blue, green, and red arrows, correspond to the  $x$ ,  $y$ , and  $z$  coordinate axes, respectively.

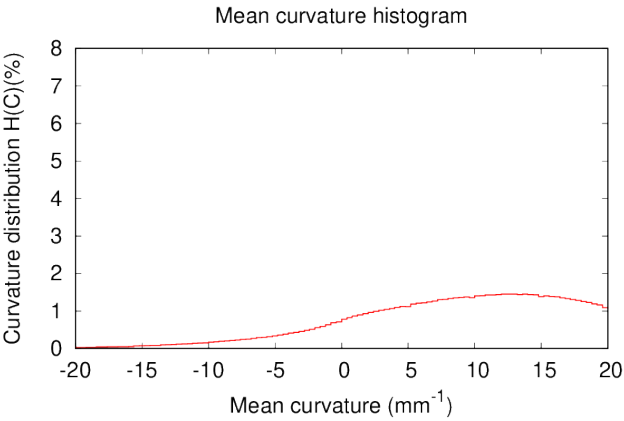

**Figure S20.** Mean curvature distribution on the whole image, from  $-20$  to  $+20 \text{ mm}^{-1}$ . Each bin is  $0.4 \text{ mm}^{-1}$  wide.

Image P04

Table S13.

| Snow type | Image size (voxel) | Pixel size ( $\mu\text{m}$ ) | $\rho$ ( $\text{kg m}^{-3}$ ) | SSA ( $\text{m}^2 \text{kg}^{-1}$ ) | $d$ (mm) | $\overline{\text{MC}}$ ( $\text{mm}^{-1}$ ) | $\text{IQR}_{\text{MC}}$ ( $\text{mm}^{-1}$ ) |
|-----------|--------------------|------------------------------|-------------------------------|-------------------------------------|----------|---------------------------------------------|-----------------------------------------------|
| DF        | 512                | 8.588                        | 157.58                        | 25.36                               | 0.2580   | 5.10                                        | 7.08                                          |

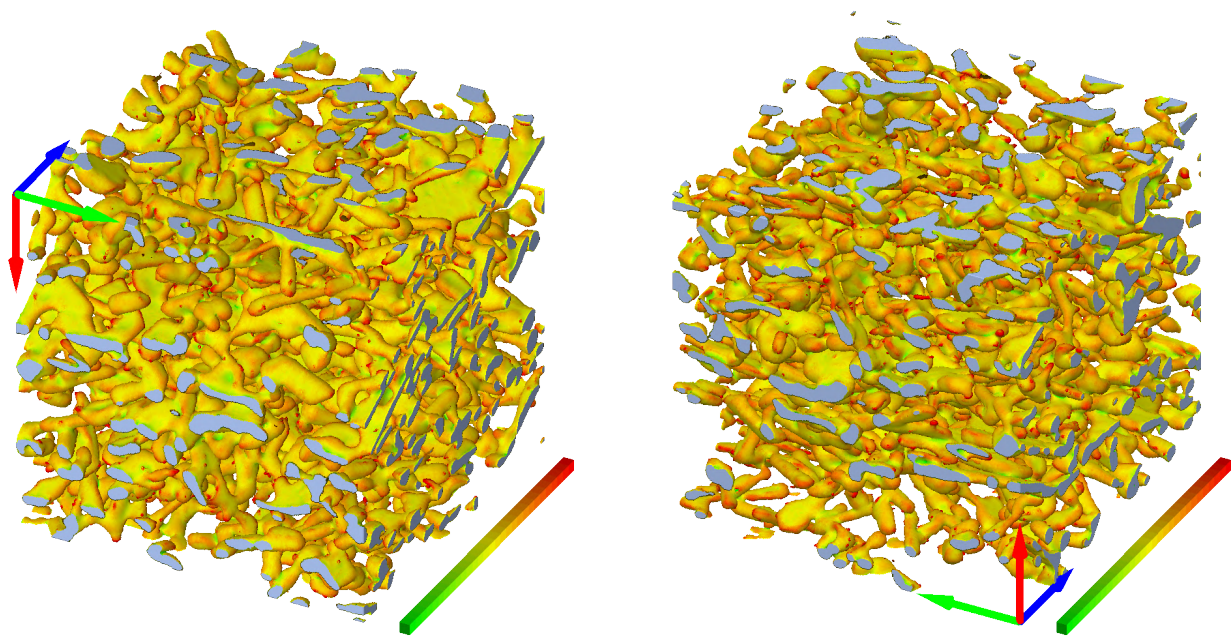

**Figure S21.** Downward (left) and upward (right) views of the whole image volume, where the mean local curvature is represented in each point of the surface. Concave surfaces are shown in green, convex surfaces in red, and flat surfaces in yellow (see colorbars from  $-30$  to  $+30 \text{ mm}^{-1}$ ). The side of each viewing cube amounts to  $4.40 \text{ mm}$ . The blue, green, and red arrows, correspond to the  $x$ ,  $y$ , and  $z$  coordinate axes, respectively.

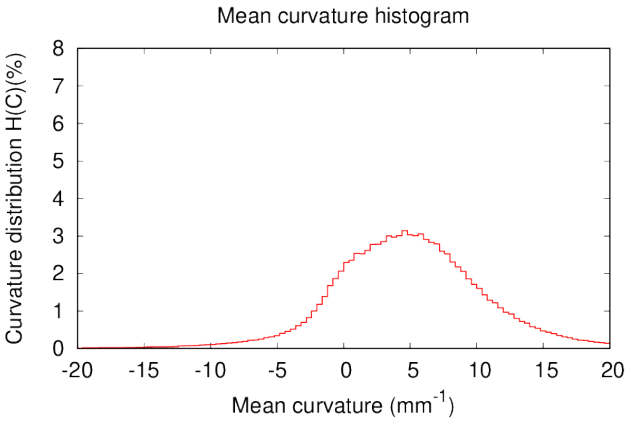

**Figure S22.** Mean curvature distribution on the whole image, from  $-20$  to  $+20 \text{ mm}^{-1}$ . Each bin is  $0.4 \text{ mm}^{-1}$  wide.

Image P06

Table S14.

| Snow type | Image size (voxel) | Pixel size ( $\mu\text{m}$ ) | $\rho$ ( $\text{kg m}^{-3}$ ) | SSA ( $\text{m}^2 \text{kg}^{-1}$ ) | $d$ (mm) | $\overline{\text{MC}}$ ( $\text{mm}^{-1}$ ) | $\text{IQR}_{\text{MC}}$ ( $\text{mm}^{-1}$ ) |
|-----------|--------------------|------------------------------|-------------------------------|-------------------------------------|----------|---------------------------------------------|-----------------------------------------------|
| RG        | 512                | 6.158                        | 354.51                        | 21.59                               | 0.3031   | 3.30                                        | 6.45                                          |

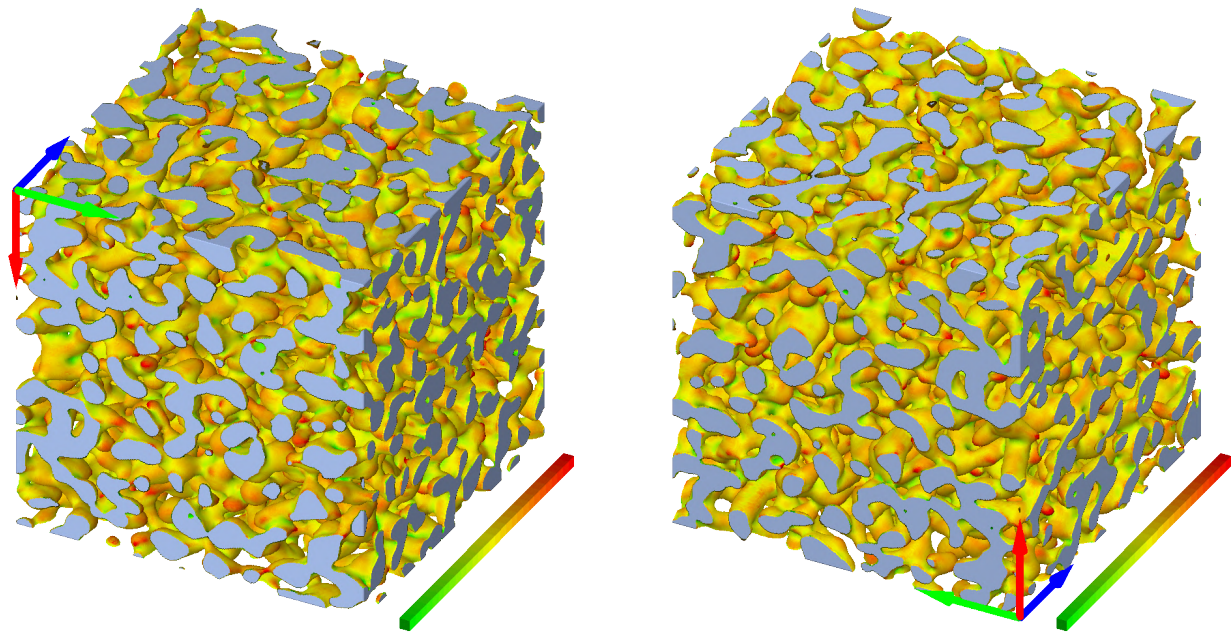

**Figure S23.** Downward (left) and upward (right) views of the whole image volume, where the mean local curvature is represented in each point of the surface. Concave surfaces are shown in green, convex surfaces in red, and flat surfaces in yellow (see colorbars from  $-30$  to  $+30 \text{ mm}^{-1}$ ). The side of each viewing cube amounts to  $3.15 \text{ mm}$ . The blue, green, and red arrows, correspond to the  $x$ ,  $y$ , and  $z$  coordinate axes, respectively.

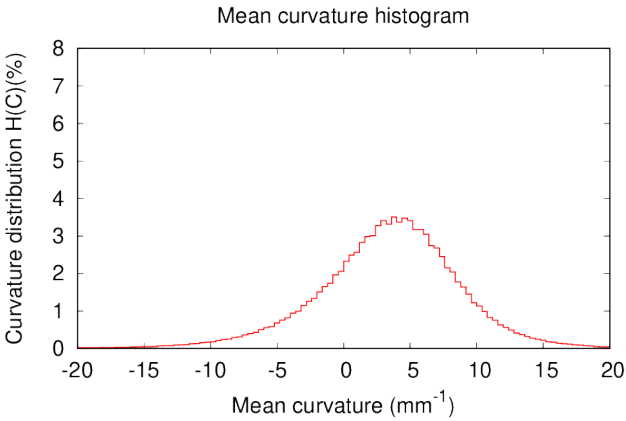

**Figure S24.** Mean curvature distribution on the whole image, from  $-20$  to  $+20 \text{ mm}^{-1}$ . Each bin is  $0.4 \text{ mm}^{-1}$  wide.



Table S15.

| Snow type | Image size (voxel) | Pixel size ( $\mu\text{m}$ ) | $\rho$ ( $\text{kg m}^{-3}$ ) | SSA ( $\text{m}^2 \text{kg}^{-1}$ ) | $d$ (mm) | $\overline{\text{MC}}$ ( $\text{mm}^{-1}$ ) | $\text{IQR}_{\text{MC}}$ ( $\text{mm}^{-1}$ ) |
|-----------|--------------------|------------------------------|-------------------------------|-------------------------------------|----------|---------------------------------------------|-----------------------------------------------|
| RG        | 512                | 8.609                        | 280.07                        | 17.15                               | 0.3816   | 3.01                                        | 5.29                                          |

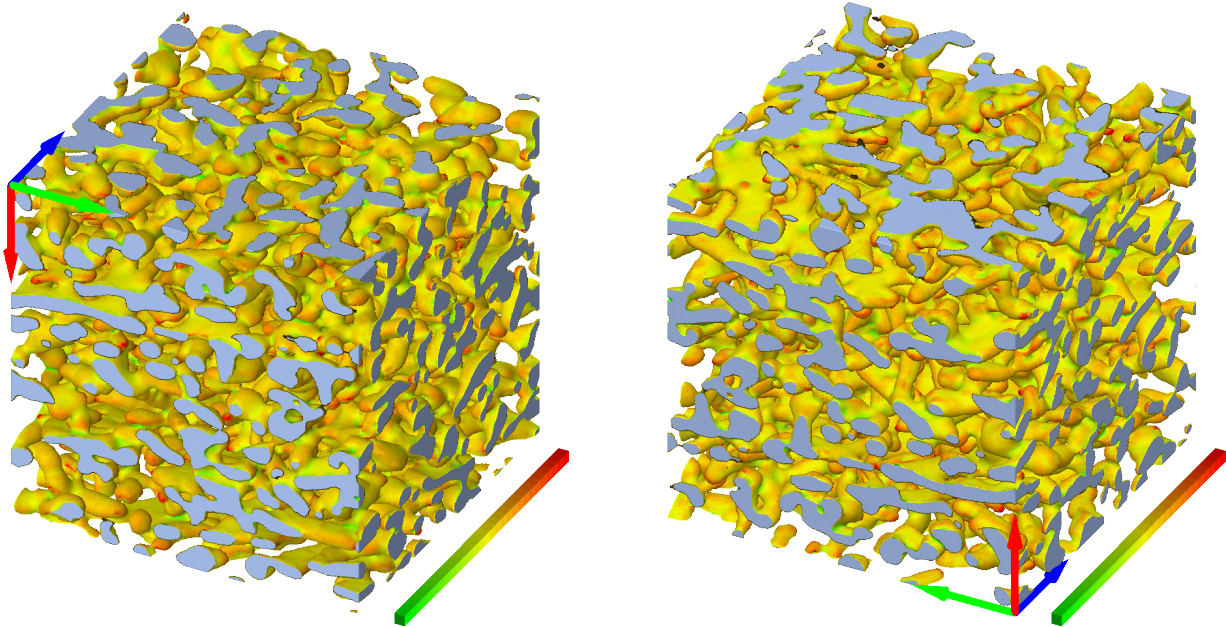

**Figure S25.** Downward (left) and upward (right) views of the whole image volume, where the mean local curvature is represented in each point of the surface. Concave surfaces are shown in green, convex surfaces in red, and flat surfaces in yellow (see colorbars from  $-30$  to  $+30 \text{ mm}^{-1}$ ). The side of each viewing cube amounts to  $4.41 \text{ mm}$ . The blue, green, and red arrows, correspond to the  $x$ ,  $y$ , and  $z$  coordinate axes, respectively.

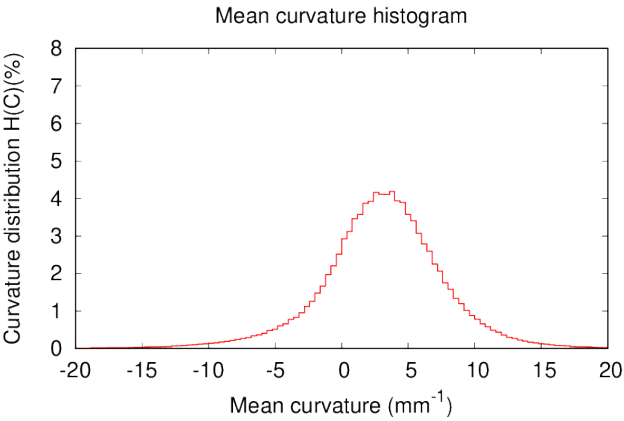

**Figure S26.** Mean curvature distribution on the whole image, from  $-20$  to  $+20 \text{ mm}^{-1}$ . Each bin is  $0.4 \text{ mm}^{-1}$  wide.

Image P08

Table S16.

| Snow type | Image size (voxel) | Pixel size ( $\mu\text{m}$ ) | $\rho$ ( $\text{kg m}^{-3}$ ) | SSA ( $\text{m}^2 \text{kg}^{-1}$ ) | $d$ (mm) | $\overline{\text{MC}}$ ( $\text{mm}^{-1}$ ) | $\text{IQR}_{\text{MC}}$ ( $\text{mm}^{-1}$ ) |
|-----------|--------------------|------------------------------|-------------------------------|-------------------------------------|----------|---------------------------------------------|-----------------------------------------------|
| RG        | 512                | 8.552                        | 378.96                        | 14.57                               | 0.4490   | 1.85                                        | 4.84                                          |

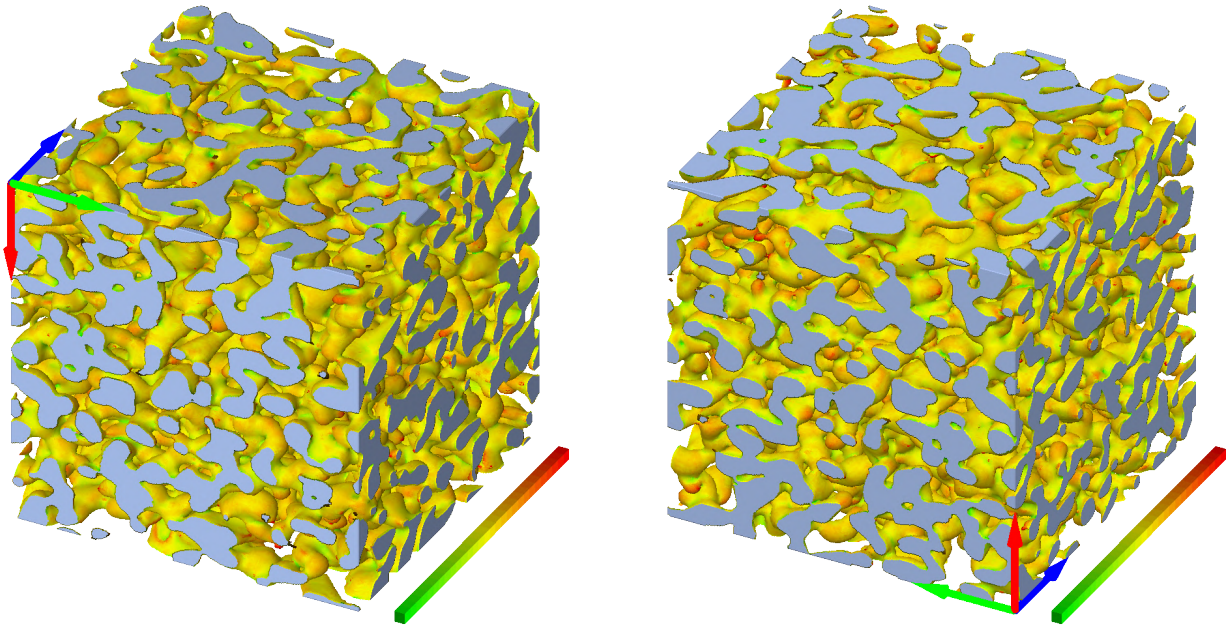

**Figure S27.** Downward (left) and upward (right) views of the whole image volume, where the mean local curvature is represented in each point of the surface. Concave surfaces are shown in green, convex surfaces in red, and flat surfaces in yellow (see colorbars from  $-30$  to  $+30 \text{ mm}^{-1}$ ). The side of each viewing cube amounts to  $4.38 \text{ mm}$ . The blue, green, and red arrows, correspond to the  $x$ ,  $y$ , and  $z$  coordinate axes, respectively.

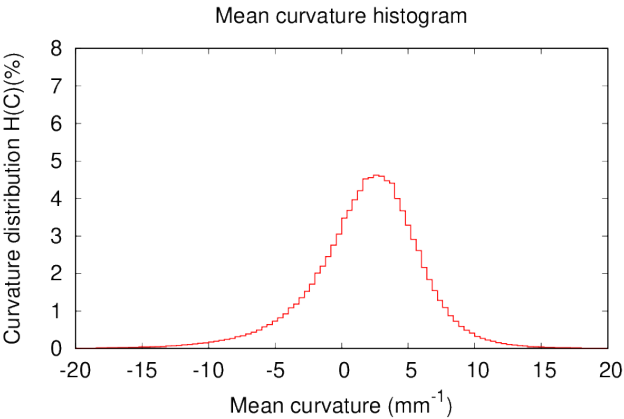

**Figure S28.** Mean curvature distribution on the whole image, from  $-20$  to  $+20 \text{ mm}^{-1}$ . Each bin is  $0.4 \text{ mm}^{-1}$  wide.

Image P09

Table S17.

| Snow type | Image size (voxel) | Pixel size ( $\mu\text{m}$ ) | $\rho$ ( $\text{kg m}^{-3}$ ) | SSA ( $\text{m}^2 \text{kg}^{-1}$ ) | $d$ (mm) | $\overline{\text{MC}}$ ( $\text{mm}^{-1}$ ) | $\text{IQR}_{\text{MC}}$ ( $\text{mm}^{-1}$ ) |
|-----------|--------------------|------------------------------|-------------------------------|-------------------------------------|----------|---------------------------------------------|-----------------------------------------------|
| RG        | 512                | 6.158                        | 396.13                        | 12.29                               | 0.5325   | 1.61                                        | 5.15                                          |

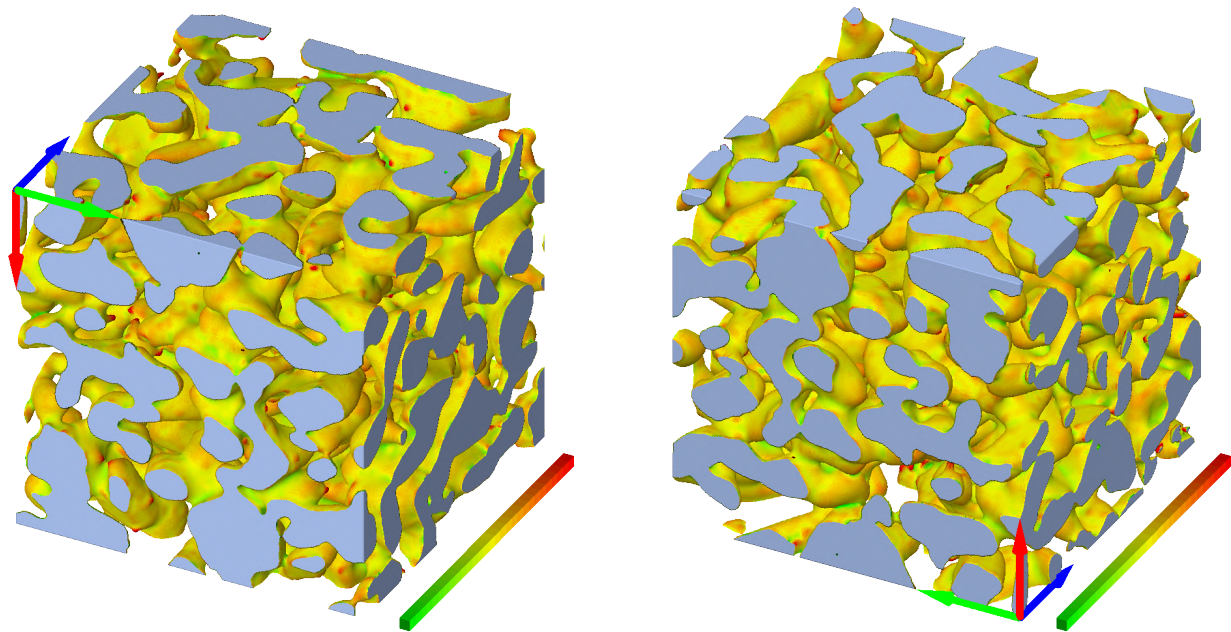

**Figure S29.** Downward (left) and upward (right) views of the whole image volume, where the mean local curvature is represented in each point of the surface. Concave surfaces are shown in green, convex surfaces in red, and flat surfaces in yellow (see colorbars from  $-30$  to  $+30 \text{ mm}^{-1}$ ). The side of each viewing cube amounts to  $3.15 \text{ mm}$ . The blue, green, and red arrows, correspond to the  $x$ ,  $y$ , and  $z$  coordinate axes, respectively.

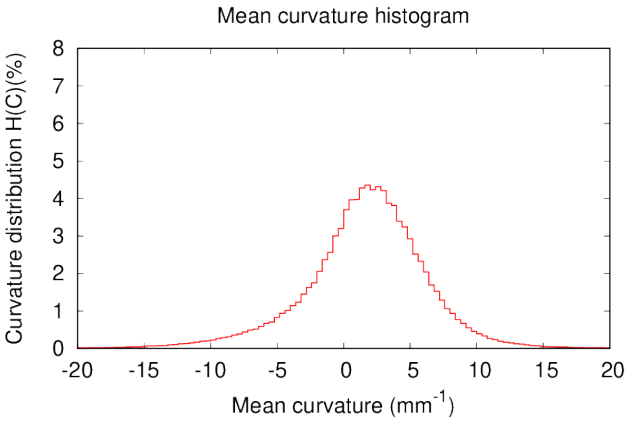

**Figure S30.** Mean curvature distribution on the whole image, from  $-20$  to  $+20 \text{ mm}^{-1}$ . Each bin is  $0.4 \text{ mm}^{-1}$  wide.

Image P10

Table S18.

| Snow type | Image size (voxel) | Pixel size ( $\mu\text{m}$ ) | $\rho$ ( $\text{kg m}^{-3}$ ) | SSA ( $\text{m}^2 \text{kg}^{-1}$ ) | $d$ (mm) | $\overline{\text{MC}}$ ( $\text{mm}^{-1}$ ) | $\text{IQR}_{\text{MC}}$ ( $\text{mm}^{-1}$ ) |
|-----------|--------------------|------------------------------|-------------------------------|-------------------------------------|----------|---------------------------------------------|-----------------------------------------------|
| RG        | 512                | 6.103                        | 396.07                        | 10.46                               | 0.6253   | 1.25                                        | 4.78                                          |

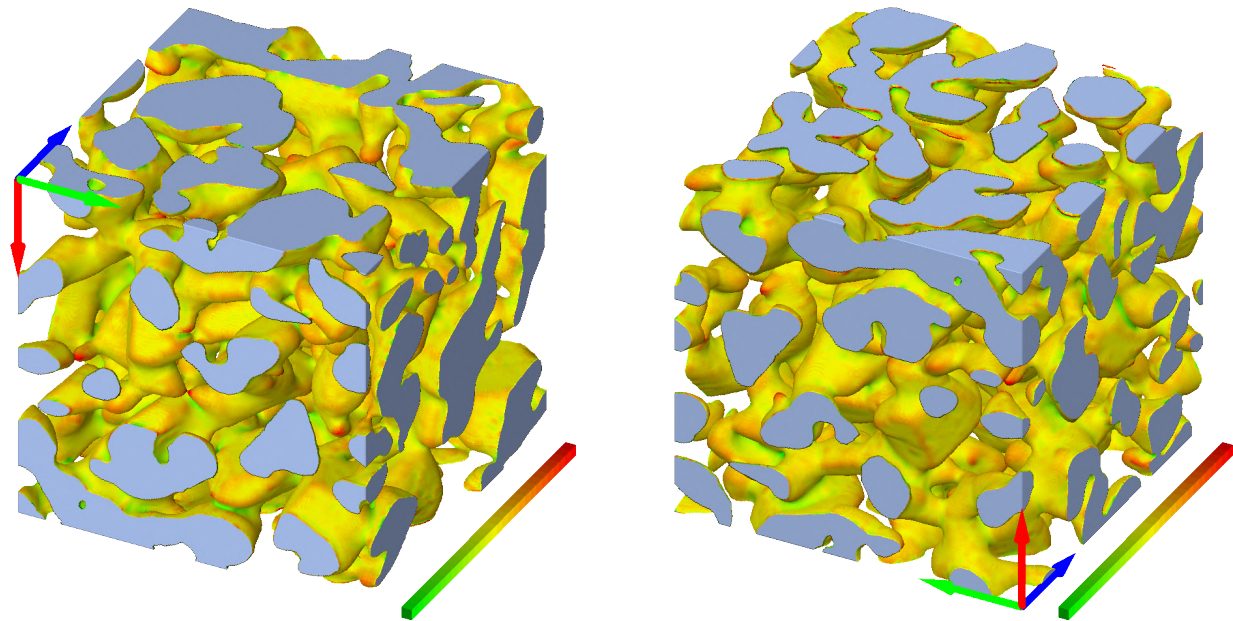

**Figure S31.** Downward (left) and upward (right) views of the whole image volume, where the mean local curvature is represented in each point of the surface. Concave surfaces are shown in green, convex surfaces in red, and flat surfaces in yellow (see colorbars from  $-30$  to  $+30 \text{ mm}^{-1}$ ). The side of each viewing cube amounts to  $3.12 \text{ mm}$ . The blue, green, and red arrows, correspond to the  $x$ ,  $y$ , and  $z$  coordinate axes, respectively.

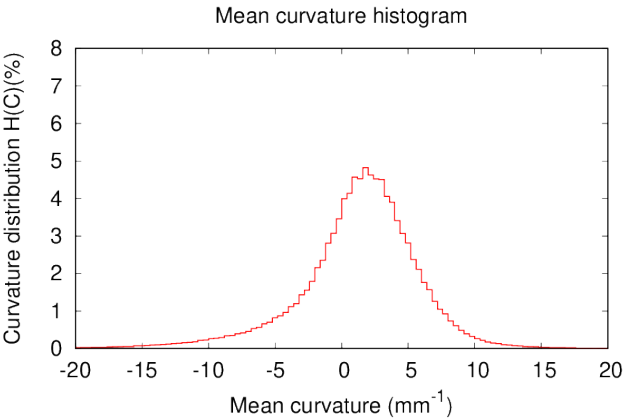

**Figure S32.** Mean curvature distribution on the whole image, from  $-20$  to  $+20 \text{ mm}^{-1}$ . Each bin is  $0.4 \text{ mm}^{-1}$  wide.



Image P11

Table S19.

| Snow type | Image size (voxel) | Pixel size ( $\mu\text{m}$ ) | $\rho$ ( $\text{kg m}^{-3}$ ) | SSA ( $\text{m}^2 \text{kg}^{-1}$ ) | $d$ (mm) | $\overline{\text{MC}}$ ( $\text{mm}^{-1}$ ) | $\text{IQR}_{\text{MC}}$ ( $\text{mm}^{-1}$ ) |
|-----------|--------------------|------------------------------|-------------------------------|-------------------------------------|----------|---------------------------------------------|-----------------------------------------------|
| RG        | 512                | 8.588                        | 413.71                        | 20.76                               | 0.3151   | 3.13                                        | 7.18                                          |

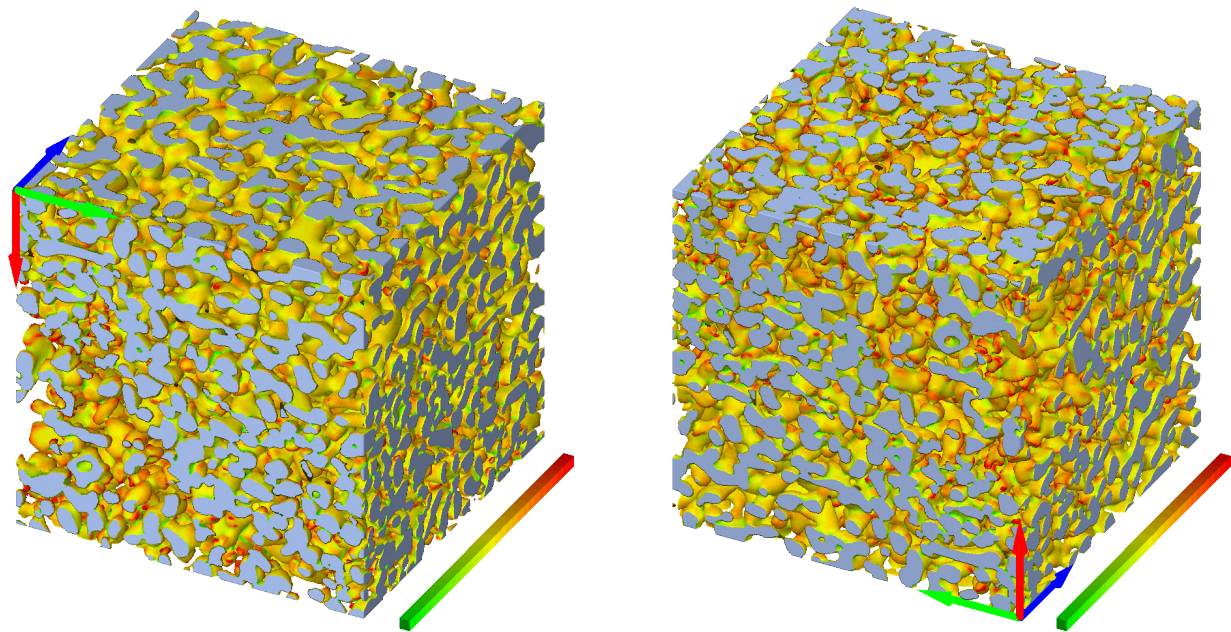

**Figure S33.** Downward (left) and upward (right) views of the whole image volume, where the mean local curvature is represented in each point of the surface. Concave surfaces are shown in green, convex surfaces in red, and flat surfaces in yellow (see colorbars from  $-30$  to  $+30 \text{ mm}^{-1}$ ). The side of each viewing cube amounts to  $4.40 \text{ mm}$ . The blue, green, and red arrows, correspond to the  $x$ ,  $y$ , and  $z$  coordinate axes, respectively.

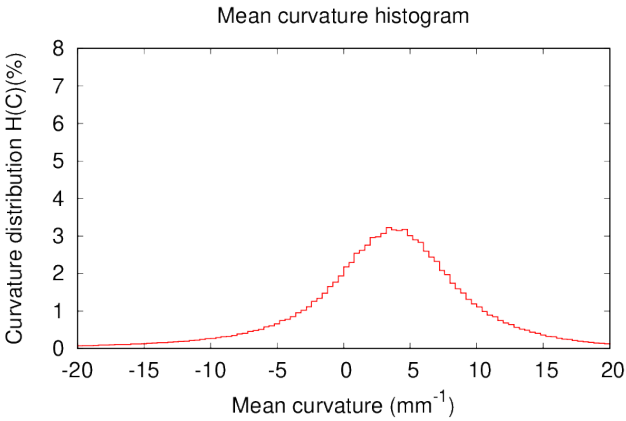

**Figure S34.** Mean curvature distribution on the whole image, from  $-20$  to  $+20 \text{ mm}^{-1}$ . Each bin is  $0.4 \text{ mm}^{-1}$  wide.



Image P14

Table S20.

| Snow type | Image size (voxel) | Pixel size ( $\mu\text{m}$ ) | $\rho$ ( $\text{kg m}^{-3}$ ) | SSA ( $\text{m}^2 \text{kg}^{-1}$ ) | $d$ (mm) | $\overline{\text{MC}}$ ( $\text{mm}^{-1}$ ) | $\text{IQR}_{\text{MC}}$ ( $\text{mm}^{-1}$ ) |
|-----------|--------------------|------------------------------|-------------------------------|-------------------------------------|----------|---------------------------------------------|-----------------------------------------------|
| RG        | 600                | 6.154                        | 359.84                        | 18.13                               | 0.3608   | 2.35                                        | 6.86                                          |

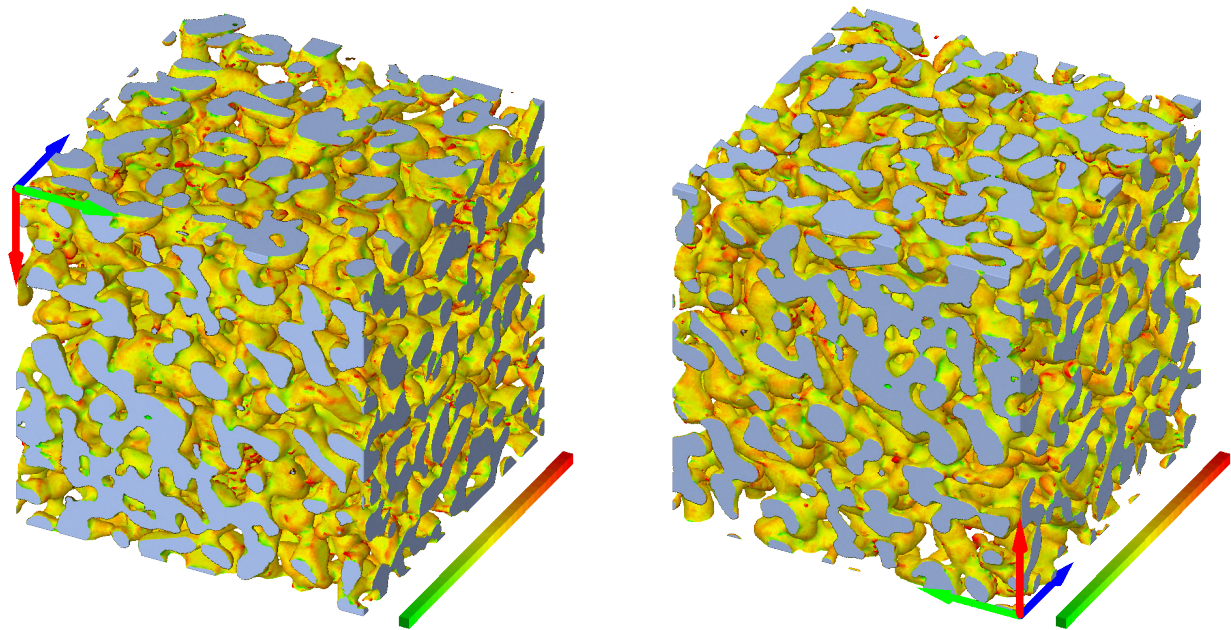

**Figure S35.** Downward (left) and upward (right) views of the whole image volume, where the mean local curvature is represented in each point of the surface. Concave surfaces are shown in green, convex surfaces in red, and flat surfaces in yellow (see colorbars from  $-30$  to  $+30 \text{ mm}^{-1}$ ). The side of each viewing cube amounts to  $3.69 \text{ mm}$ . The blue, green, and red arrows, correspond to the  $x$ ,  $y$ , and  $z$  coordinate axes, respectively.

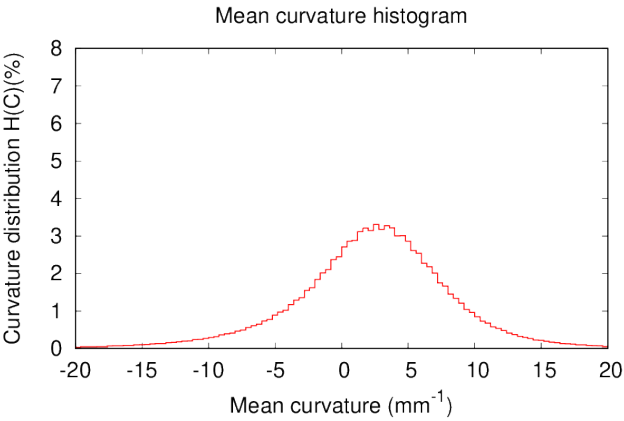

**Figure S36.** Mean curvature distribution on the whole image, from  $-20$  to  $+20 \text{ mm}^{-1}$ . Each bin is  $0.4 \text{ mm}^{-1}$  wide.

Image P15

Table S21.

| Snow type | Image size (voxel) | Pixel size ( $\mu\text{m}$ ) | $\rho$ ( $\text{kg m}^{-3}$ ) | SSA ( $\text{m}^2 \text{kg}^{-1}$ ) | $d$ (mm) | $\overline{\text{MC}}$ ( $\text{mm}^{-1}$ ) | $\text{IQR}_{\text{MC}}$ ( $\text{mm}^{-1}$ ) |
|-----------|--------------------|------------------------------|-------------------------------|-------------------------------------|----------|---------------------------------------------|-----------------------------------------------|
| RG        | 512                | 6.158                        | 315.50                        | 16.09                               | 0.4067   | 2.65                                        | 5.65                                          |

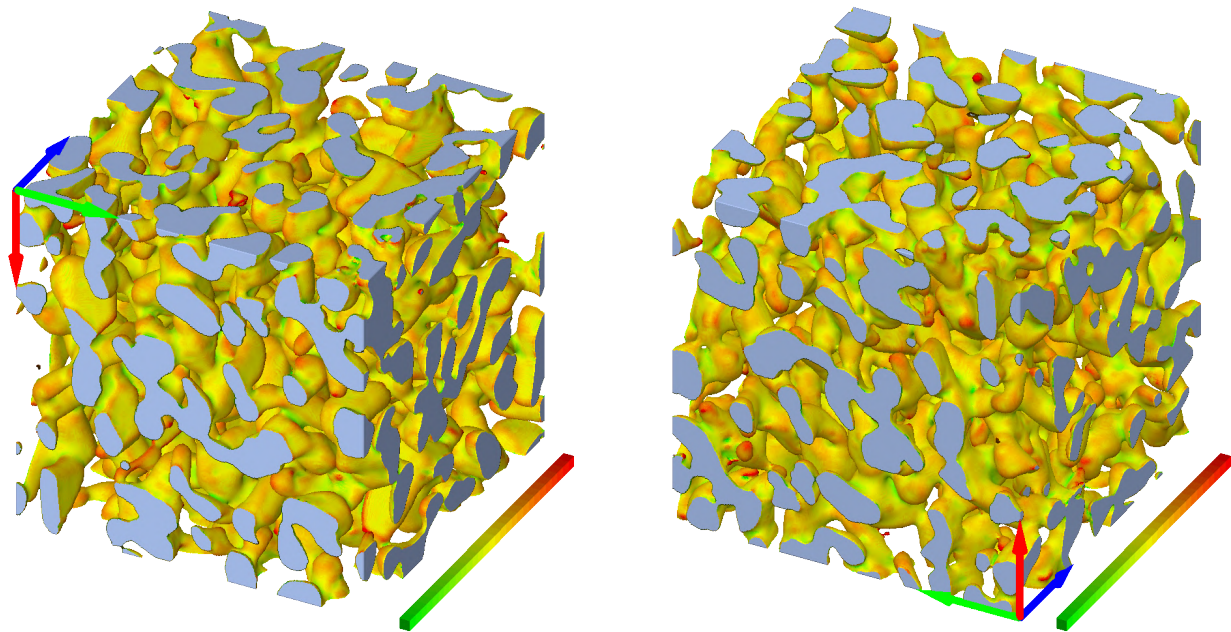

**Figure S37.** Downward (left) and upward (right) views of the whole image volume, where the mean local curvature is represented in each point of the surface. Concave surfaces are shown in green, convex surfaces in red, and flat surfaces in yellow (see colorbars from  $-30$  to  $+30 \text{ mm}^{-1}$ ). The side of each viewing cube amounts to  $3.15 \text{ mm}$ . The blue, green, and red arrows, correspond to the  $x$ ,  $y$ , and  $z$  coordinate axes, respectively.

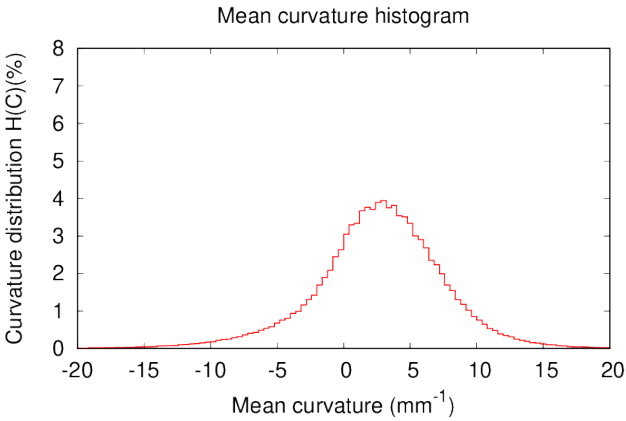

**Figure S38.** Mean curvature distribution on the whole image, from  $-20$  to  $+20 \text{ mm}^{-1}$ . Each bin is  $0.4 \text{ mm}^{-1}$  wide.

Table S22.

| Snow type | Image size (voxel) | Pixel size ( $\mu\text{m}$ ) | $\rho$ ( $\text{kg m}^{-3}$ ) | SSA ( $\text{m}^2 \text{kg}^{-1}$ ) | $d$ (mm) | $\overline{\text{MC}}$ ( $\text{mm}^{-1}$ ) | $\text{IQR}_{\text{MC}}$ ( $\text{mm}^{-1}$ ) |
|-----------|--------------------|------------------------------|-------------------------------|-------------------------------------|----------|---------------------------------------------|-----------------------------------------------|
| RG        | 651                | 8.609                        | 430.59                        | 17.34                               | 0.3773   | 2.37                                        | 6.61                                          |

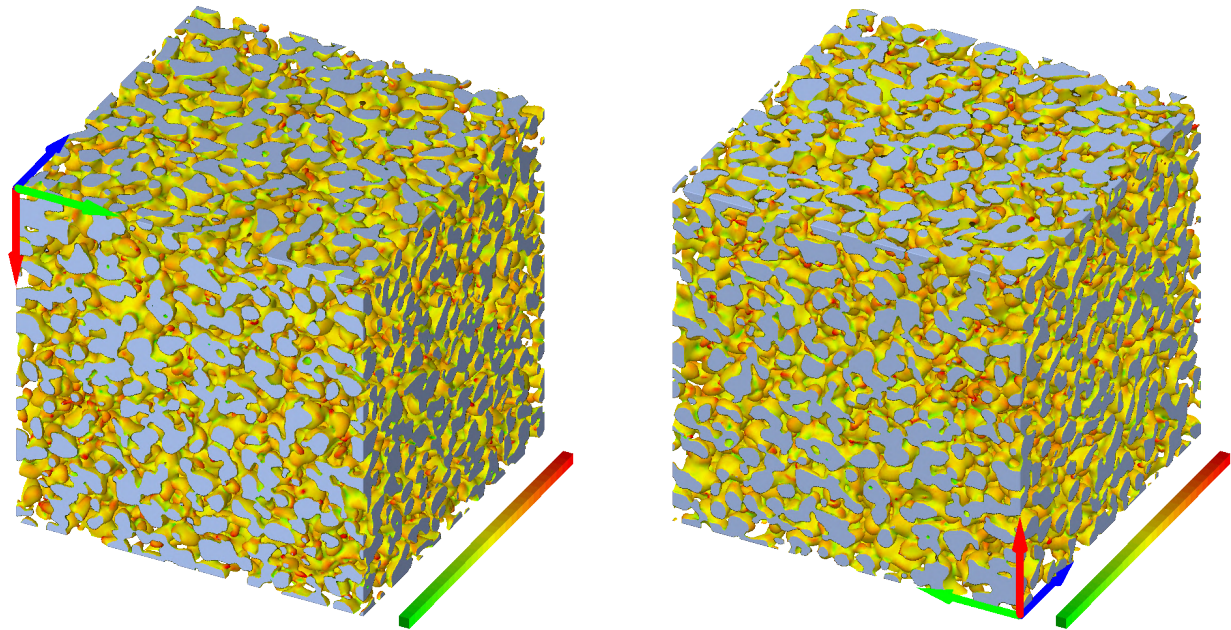

**Figure S39.** Downward (left) and upward (right) views of the whole image volume, where the mean local curvature is represented in each point of the surface. Concave surfaces are shown in green, convex surfaces in red, and flat surfaces in yellow (see colorbars from  $-30$  to  $+30 \text{ mm}^{-1}$ ). The side of each viewing cube amounts to  $5.60 \text{ mm}$ . The blue, green, and red arrows, correspond to the  $x$ ,  $y$ , and  $z$  coordinate axes, respectively.

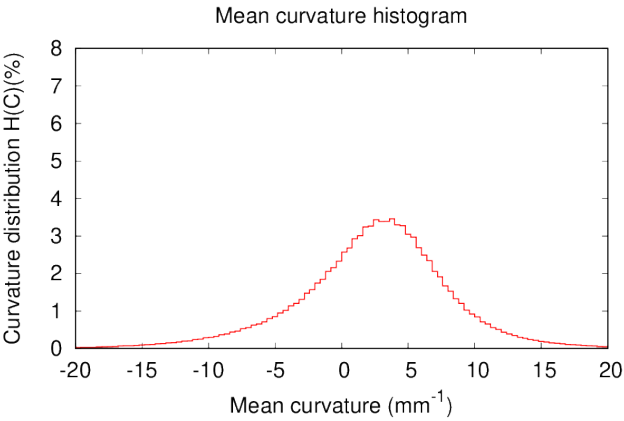

**Figure S40.** Mean curvature distribution on the whole image, from  $-20$  to  $+20 \text{ mm}^{-1}$ . Each bin is  $0.4 \text{ mm}^{-1}$  wide.



Image NH1

Table S23.

| Snow type | Image size (voxel) | Pixel size ( $\mu\text{m}$ ) | $\rho$ ( $\text{kg m}^{-3}$ ) | SSA ( $\text{m}^2 \text{kg}^{-1}$ ) | $d$ (mm) | $\overline{\text{MC}}$ ( $\text{mm}^{-1}$ ) | $\text{IQR}_{\text{MC}}$ ( $\text{mm}^{-1}$ ) |
|-----------|--------------------|------------------------------|-------------------------------|-------------------------------------|----------|---------------------------------------------|-----------------------------------------------|
| MF        | 651                | 8.609                        | 544.08                        | 6.99                                | 0.9363   | -0.05                                       | 8.10                                          |

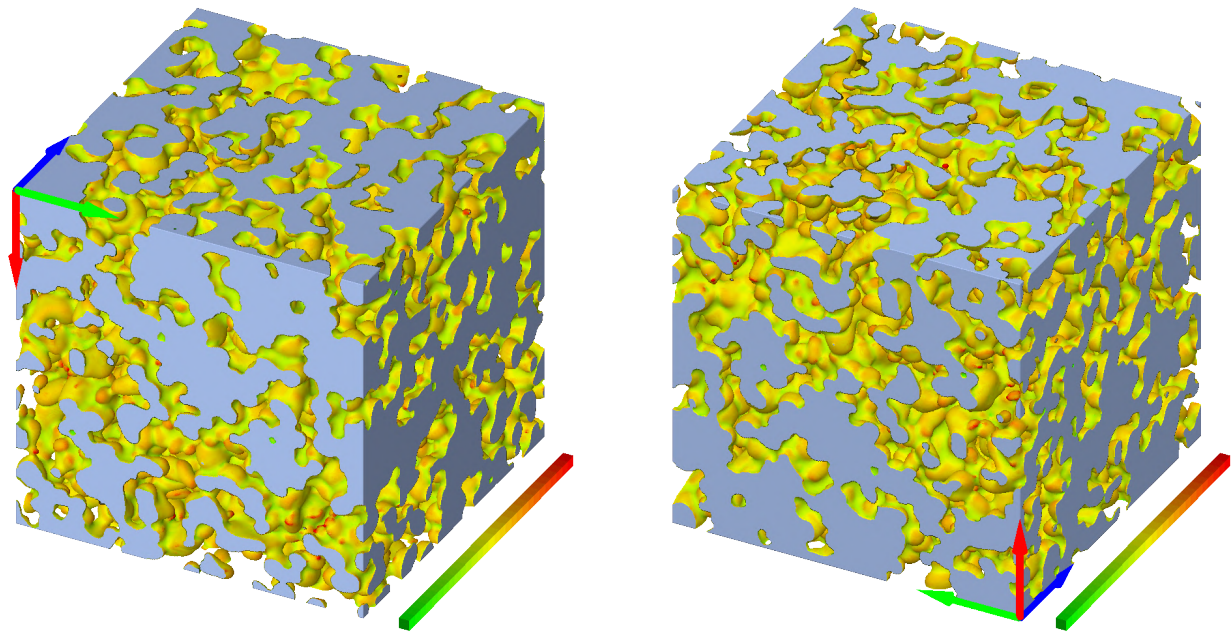

**Figure S41.** Downward (left) and upward (right) views of the whole image volume, where the mean local curvature is represented in each point of the surface. Concave surfaces are shown in green, convex surfaces in red, and flat surfaces in yellow (see colorbars from  $-30$  to  $+30 \text{ mm}^{-1}$ ). The side of each viewing cube amounts to  $5.60 \text{ mm}$ . The blue, green, and red arrows, correspond to the  $x$ ,  $y$ , and  $z$  coordinate axes, respectively.

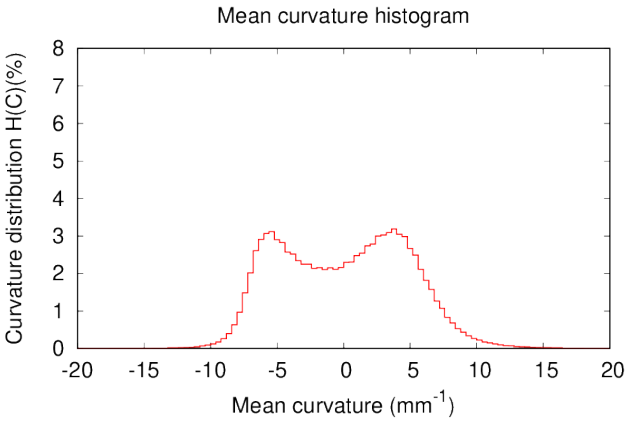

**Figure S42.** Mean curvature distribution on the whole image, from  $-20$  to  $+20 \text{ mm}^{-1}$ . Each bin is  $0.4 \text{ mm}^{-1}$  wide.

Table S24.

| Snow type | Image size (voxel) | Pixel size ( $\mu\text{m}$ ) | $\rho$ ( $\text{kg m}^{-3}$ ) | SSA ( $\text{m}^2 \text{kg}^{-1}$ ) | $d$ (mm) | $\overline{\text{MC}}$ ( $\text{mm}^{-1}$ ) | $\text{IQR}_{\text{MC}}$ ( $\text{mm}^{-1}$ ) |
|-----------|--------------------|------------------------------|-------------------------------|-------------------------------------|----------|---------------------------------------------|-----------------------------------------------|
| MF        | 651                | 8.590                        | 512.89                        | 7.69                                | 0.8514   | 0.14                                        | 6.82                                          |

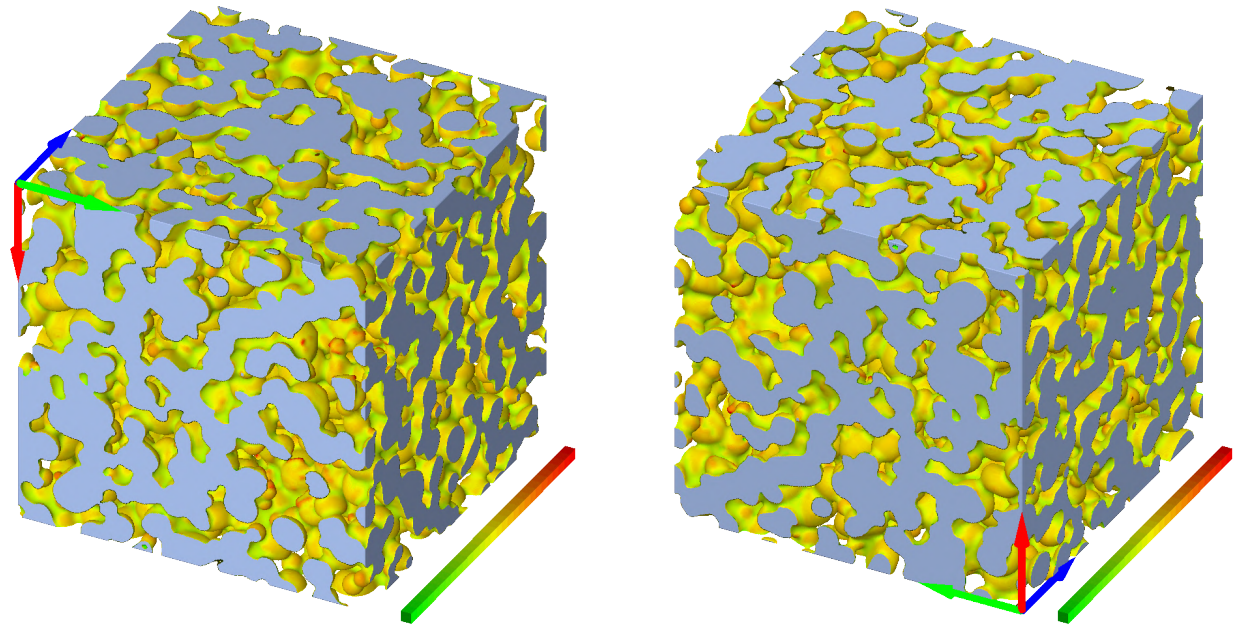

**Figure S43.** Downward (left) and upward (right) views of the whole image volume, where the mean local curvature is represented in each point of the surface. Concave surfaces are shown in green, convex surfaces in red, and flat surfaces in yellow (see colorbars from  $-30$  to  $+30 \text{ mm}^{-1}$ ). The side of each viewing cube amounts to  $5.59 \text{ mm}$ . The blue, green, and red arrows, correspond to the  $x$ ,  $y$ , and  $z$  coordinate axes, respectively.

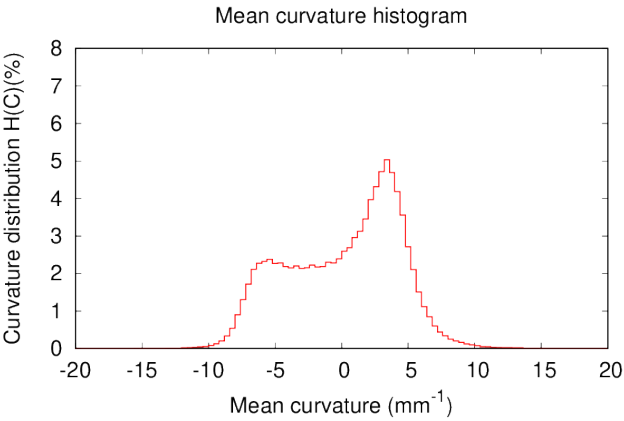

**Figure S44.** Mean curvature distribution on the whole image, from  $-20$  to  $+20 \text{ mm}^{-1}$ . Each bin is  $0.4 \text{ mm}^{-1}$  wide.

Image NH2

Table S25.

| Snow type | Image size (voxel) | Pixel size ( $\mu\text{m}$ ) | $\rho$ ( $\text{kg m}^{-3}$ ) | SSA ( $\text{m}^2 \text{kg}^{-1}$ ) | $d$ (mm) | $\overline{\text{MC}}$ ( $\text{mm}^{-1}$ ) | $\text{IQR}_{\text{MC}}$ ( $\text{mm}^{-1}$ ) |
|-----------|--------------------|------------------------------|-------------------------------|-------------------------------------|----------|---------------------------------------------|-----------------------------------------------|
| MF        | 651                | 8.590                        | 502.60                        | 6.18                                | 1.0584   | 0.31                                        | 5.15                                          |

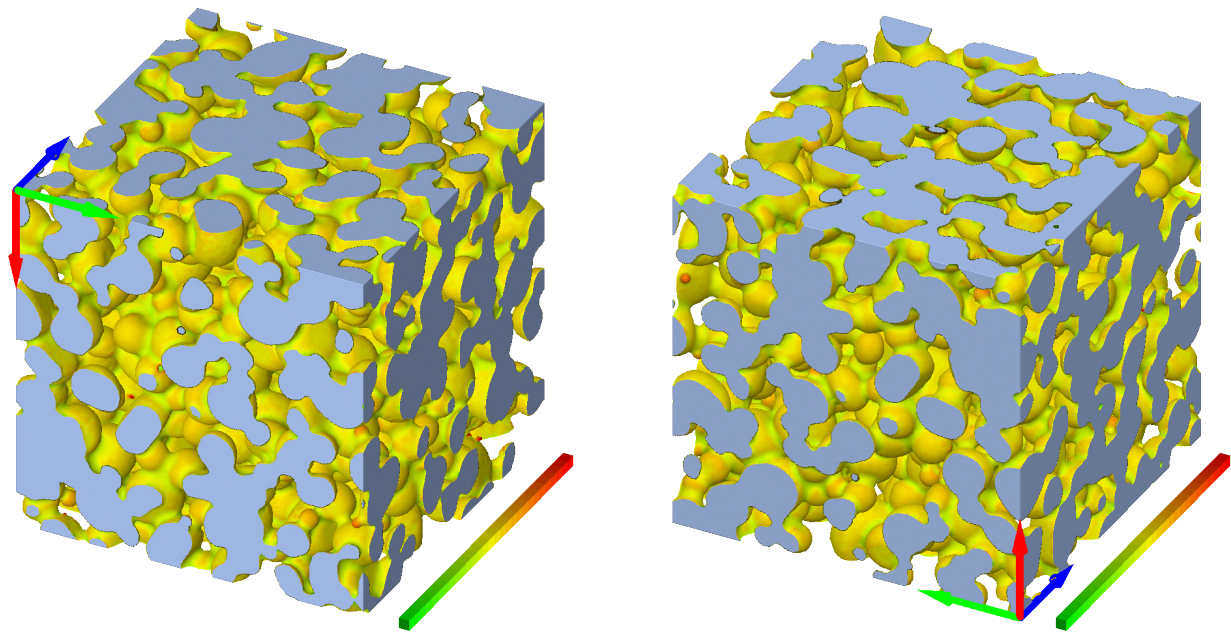

**Figure S45.** Downward (left) and upward (right) views of the whole image volume, where the mean local curvature is represented in each point of the surface. Concave surfaces are shown in green, convex surfaces in red, and flat surfaces in yellow (see colorbars from  $-30$  to  $+30 \text{ mm}^{-1}$ ). The side of each viewing cube amounts to  $5.59 \text{ mm}$ . The blue, green, and red arrows, correspond to the  $x$ ,  $y$ , and  $z$  coordinate axes, respectively.

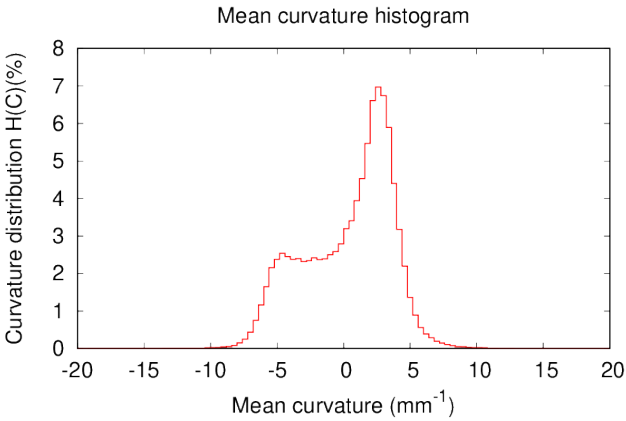

**Figure S46.** Mean curvature distribution on the whole image, from  $-20$  to  $+20 \text{ mm}^{-1}$ . Each bin is  $0.4 \text{ mm}^{-1}$  wide.

Table S26.

| Snow type | Image size (voxel) | Pixel size ( $\mu\text{m}$ ) | $\rho$ ( $\text{kg m}^{-3}$ ) | SSA ( $\text{m}^2 \text{kg}^{-1}$ ) | $d$ (mm) | $\overline{\text{MC}}$ ( $\text{mm}^{-1}$ ) | $\text{IQR}_{\text{MC}}$ ( $\text{mm}^{-1}$ ) |
|-----------|--------------------|------------------------------|-------------------------------|-------------------------------------|----------|---------------------------------------------|-----------------------------------------------|
| MF        | 1000               | 9.460                        | 472.83                        | 3.78                                | 1.7302   | 0.35                                        | 3.08                                          |

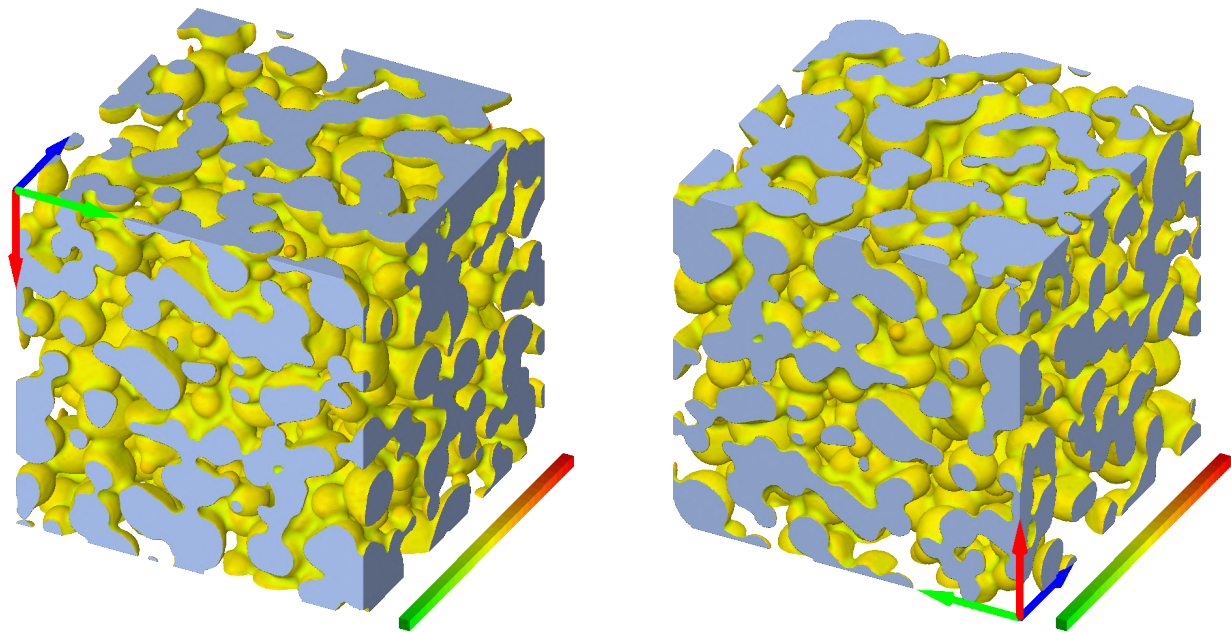

**Figure S47.** Downward (left) and upward (right) views of the whole image volume, where the mean local curvature is represented in each point of the surface. Concave surfaces are shown in green, convex surfaces in red, and flat surfaces in yellow (see colorbars from  $-30$  to  $+30 \text{ mm}^{-1}$ ). The side of each viewing cube amounts to  $9.46 \text{ mm}$ . The blue, green, and red arrows, correspond to the  $x$ ,  $y$ , and  $z$  coordinate axes, respectively.

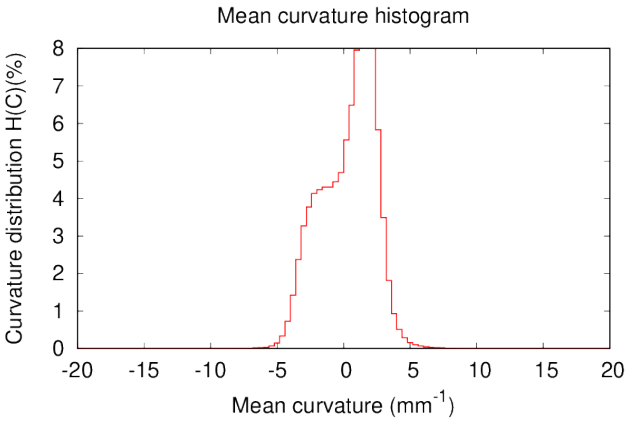

**Figure S48.** Mean curvature distribution on the whole image, from  $-20$  to  $+20 \text{ mm}^{-1}$ . Each bin is  $0.4 \text{ mm}^{-1}$  wide.



Table S27.

| Snow type | Image size (voxel) | Pixel size ( $\mu\text{m}$ ) | $\rho$ ( $\text{kg m}^{-3}$ ) | SSA ( $\text{m}^2 \text{kg}^{-1}$ ) | $d$ (mm) | $\overline{\text{MC}}$ ( $\text{mm}^{-1}$ ) | $\text{IQR}_{\text{MC}}$ ( $\text{mm}^{-1}$ ) |
|-----------|--------------------|------------------------------|-------------------------------|-------------------------------------|----------|---------------------------------------------|-----------------------------------------------|
| MF        | 542                | 10.000                       | 522.31                        | 8.49                                | 0.7702   | 0.13                                        | 6.90                                          |

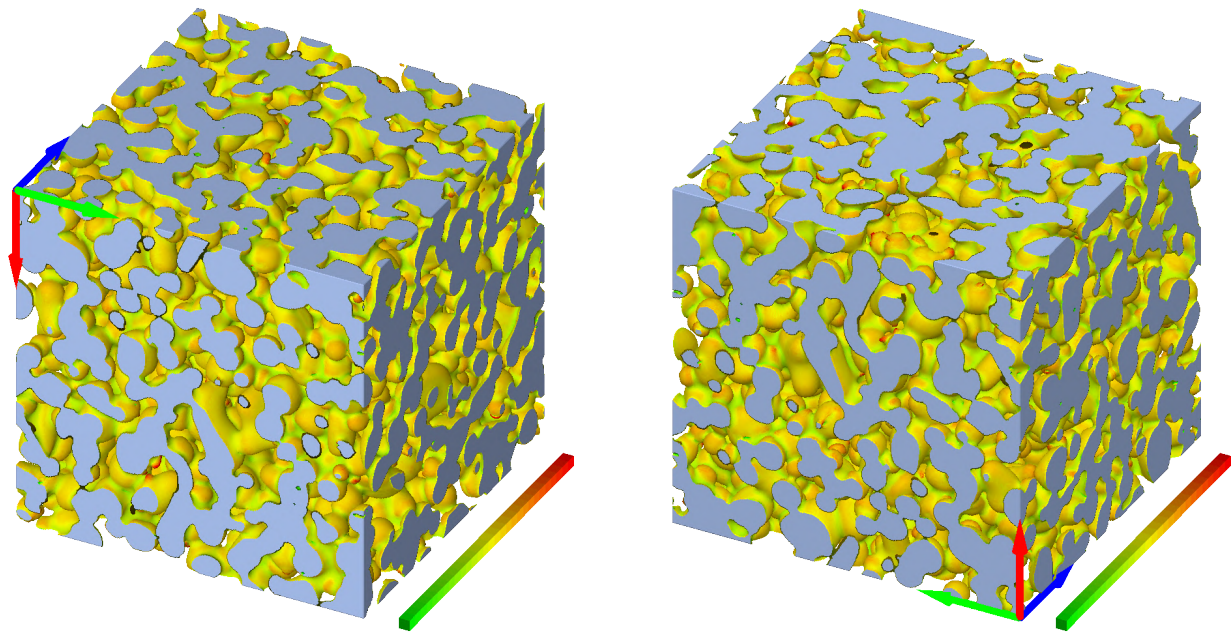

**Figure S49.** Downward (left) and upward (right) views of the whole image volume, where the mean local curvature is represented in each point of the surface. Concave surfaces are shown in green, convex surfaces in red, and flat surfaces in yellow (see colorbars from  $-30$  to  $+30 \text{ mm}^{-1}$ ). The side of each viewing cube amounts to  $5.42 \text{ mm}$ . The blue, green, and red arrows, correspond to the  $x$ ,  $y$ , and  $z$  coordinate axes, respectively.

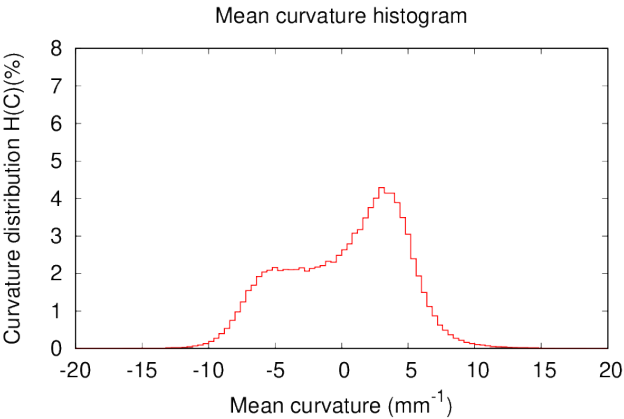

**Figure S50.** Mean curvature distribution on the whole image, from  $-20$  to  $+20 \text{ mm}^{-1}$ . Each bin is  $0.4 \text{ mm}^{-1}$  wide.



Image E2b

Table S28.

| Snow type | Image size (voxel) | Pixel size ( $\mu\text{m}$ ) | $\rho$ ( $\text{kg m}^{-3}$ ) | SSA ( $\text{m}^2 \text{kg}^{-1}$ ) | $d$ (mm) | $\overline{\text{MC}}$ ( $\text{mm}^{-1}$ ) | $\text{IQR}_{\text{MC}}$ ( $\text{mm}^{-1}$ ) |
|-----------|--------------------|------------------------------|-------------------------------|-------------------------------------|----------|---------------------------------------------|-----------------------------------------------|
| FC        | 1200               | 4.910                        | 262.74                        | 15.43                               | 0.4240   | 1.99                                        | 7.64                                          |

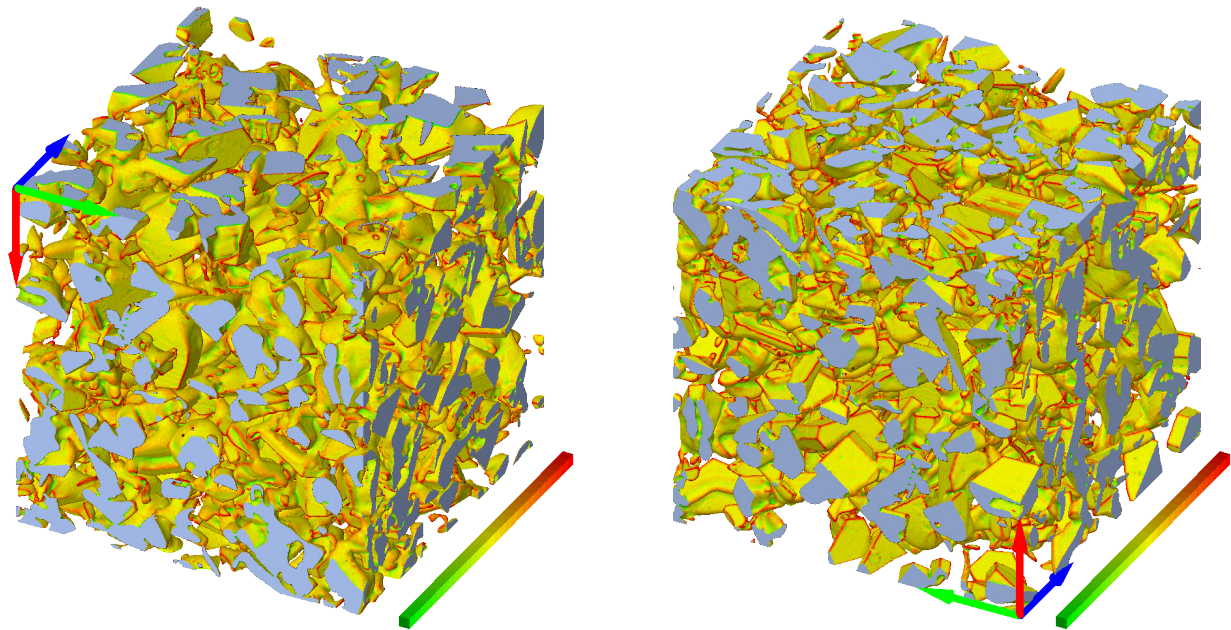

**Figure S51.** Downward (left) and upward (right) views of the whole image volume, where the mean local curvature is represented in each point of the surface. Concave surfaces are shown in green, convex surfaces in red, and flat surfaces in yellow (see colorbars from  $-30$  to  $+30 \text{ mm}^{-1}$ ). The side of each viewing cube amounts to  $5.89 \text{ mm}$ . The blue, green, and red arrows, correspond to the  $x$ ,  $y$ , and  $z$  coordinate axes, respectively.

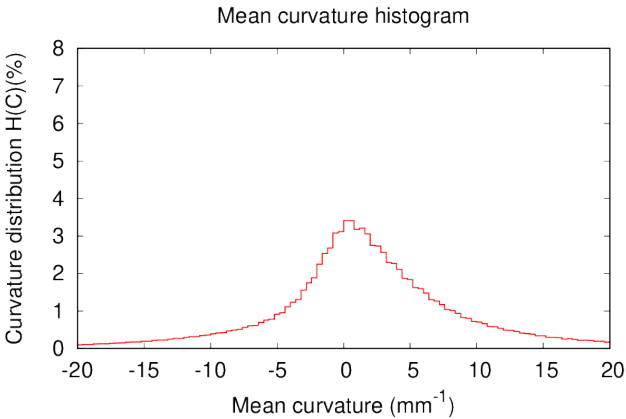

**Figure S52.** Mean curvature distribution on the whole image, from  $-20$  to  $+20 \text{ mm}^{-1}$ . Each bin is  $0.4 \text{ mm}^{-1}$  wide.

Image 0A

Table S29.

| Snow type | Image size (voxel) | Pixel size ( $\mu\text{m}$ ) | $\rho$ ( $\text{kg m}^{-3}$ ) | SSA ( $\text{m}^2 \text{kg}^{-1}$ ) | $d$ (mm) | $\overline{\text{MC}}$ ( $\text{mm}^{-1}$ ) | $\text{IQR}_{\text{MC}}$ ( $\text{mm}^{-1}$ ) |
|-----------|--------------------|------------------------------|-------------------------------|-------------------------------------|----------|---------------------------------------------|-----------------------------------------------|
| RG        | 700                | 8.392                        | 314.83                        | 27.68                               | 0.2367   | 4.87                                        | 9.38                                          |

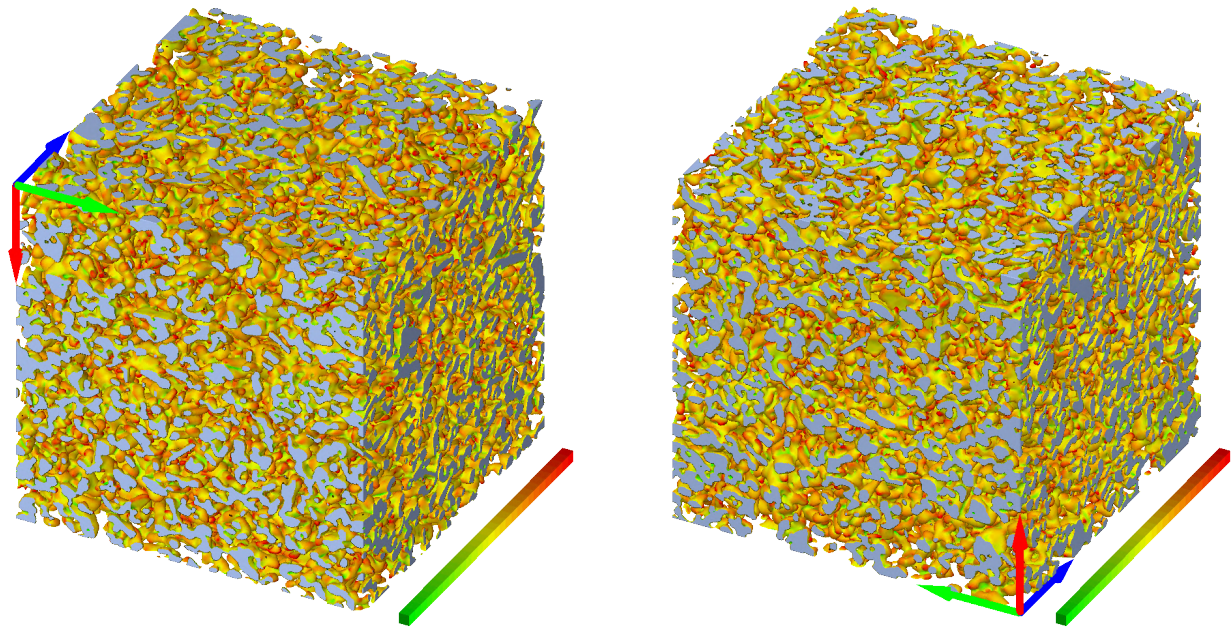

**Figure S53.** Downward (left) and upward (right) views of the whole image volume, where the mean local curvature is represented in each point of the surface. Concave surfaces are shown in green, convex surfaces in red, and flat surfaces in yellow (see colorbars from  $-30$  to  $+30 \text{ mm}^{-1}$ ). The side of each viewing cube amounts to  $5.87 \text{ mm}$ . The blue, green, and red arrows, correspond to the  $x$ ,  $y$ , and  $z$  coordinate axes, respectively.

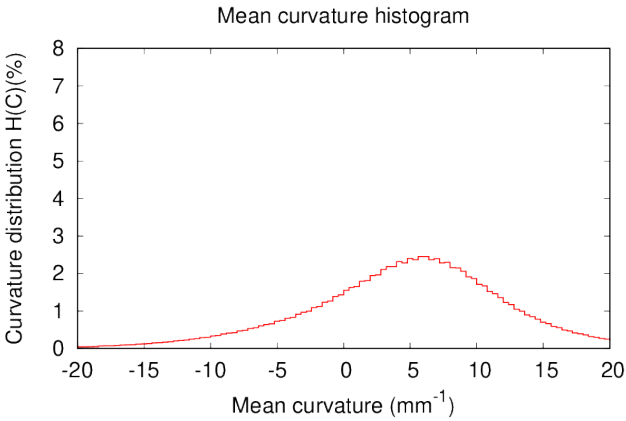

**Figure S54.** Mean curvature distribution on the whole image, from  $-20$  to  $+20 \text{ mm}^{-1}$ . Each bin is  $0.4 \text{ mm}^{-1}$  wide.

Image 1A

Table S30.

| Snow type | Image size (voxel) | Pixel size ( $\mu\text{m}$ ) | $\rho$ ( $\text{kg m}^{-3}$ ) | SSA ( $\text{m}^2 \text{kg}^{-1}$ ) | $d$ (mm) | $\overline{\text{MC}}$ ( $\text{mm}^{-1}$ ) | $\text{IQR}_{\text{MC}}$ ( $\text{mm}^{-1}$ ) |
|-----------|--------------------|------------------------------|-------------------------------|-------------------------------------|----------|---------------------------------------------|-----------------------------------------------|
| RG        | 700                | 8.395                        | 275.04                        | 23.37                               | 0.2800   | 4.67                                        | 9.17                                          |

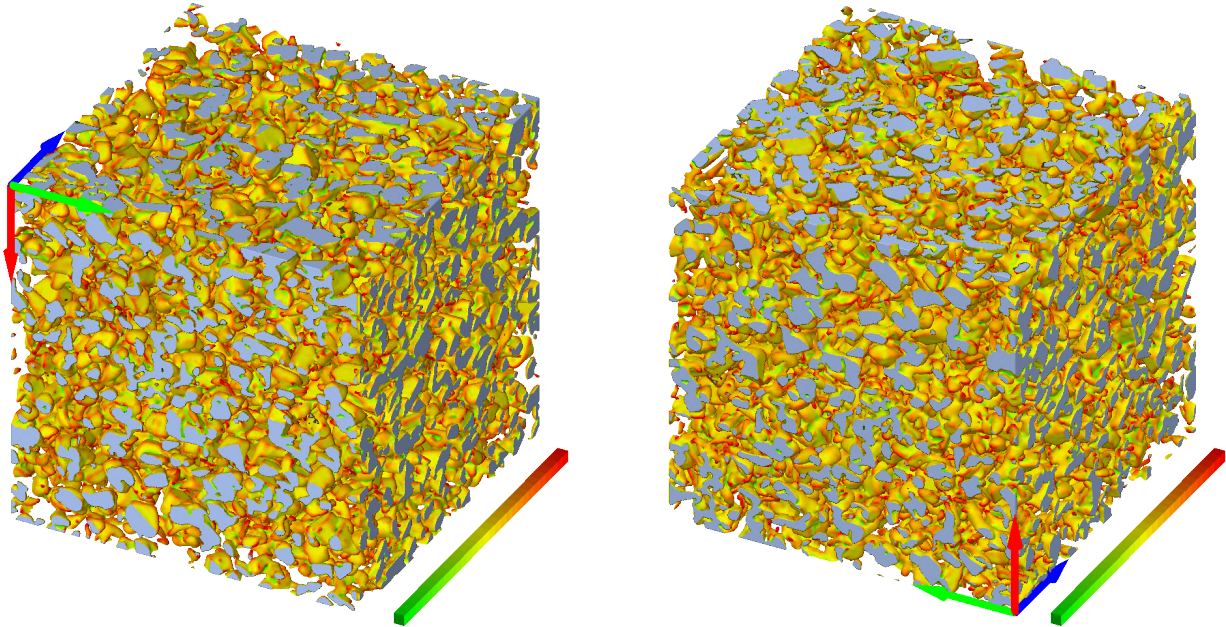

**Figure S55.** Downward (left) and upward (right) views of the whole image volume, where the mean local curvature is represented in each point of the surface. Concave surfaces are shown in green, convex surfaces in red, and flat surfaces in yellow (see colorbars from  $-30$  to  $+30 \text{ mm}^{-1}$ ). The side of each viewing cube amounts to  $5.88 \text{ mm}$ . The blue, green, and red arrows, correspond to the  $x$ ,  $y$ , and  $z$  coordinate axes, respectively.

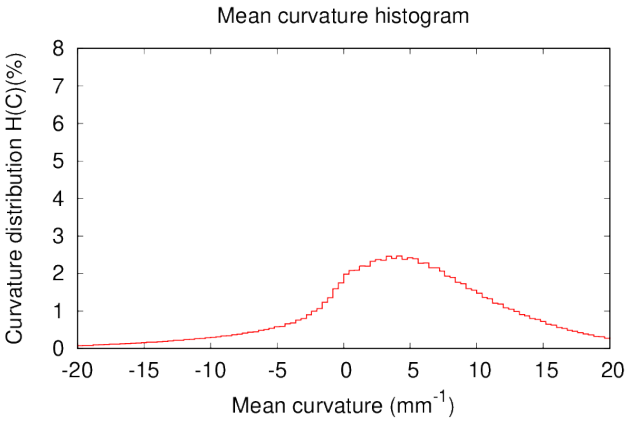

**Figure S56.** Mean curvature distribution on the whole image, from  $-20$  to  $+20 \text{ mm}^{-1}$ . Each bin is  $0.4 \text{ mm}^{-1}$  wide.



Image 2A

Table S31.

| Snow type | Image size (voxel) | Pixel size ( $\mu\text{m}$ ) | $\rho$ ( $\text{kg m}^{-3}$ ) | SSA ( $\text{m}^2 \text{kg}^{-1}$ ) | $d$ (mm) | $\overline{\text{MC}}$ ( $\text{mm}^{-1}$ ) | $\text{IQR}_{\text{MC}}$ ( $\text{mm}^{-1}$ ) |
|-----------|--------------------|------------------------------|-------------------------------|-------------------------------------|----------|---------------------------------------------|-----------------------------------------------|
| FC        | 700                | 8.373                        | 282.70                        | 20.75                               | 0.3154   | 3.53                                        | 9.03                                          |

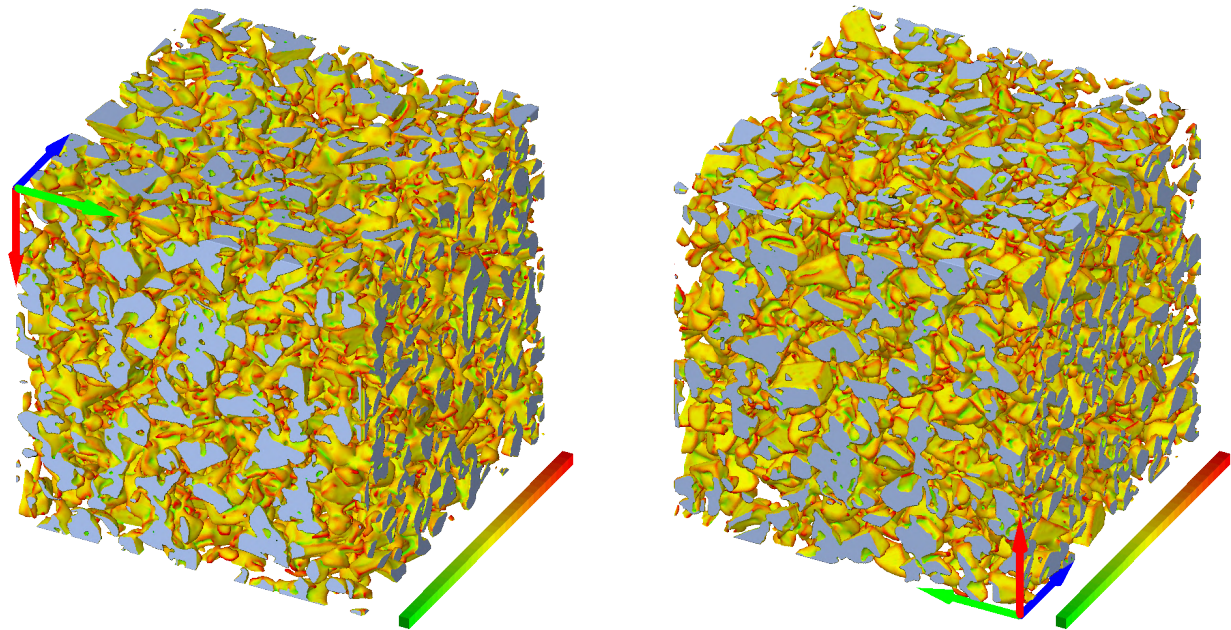

**Figure S57.** Downward (left) and upward (right) views of the whole image volume, where the mean local curvature is represented in each point of the surface. Concave surfaces are shown in green, convex surfaces in red, and flat surfaces in yellow (see colorbars from  $-30$  to  $+30 \text{ mm}^{-1}$ ). The side of each viewing cube amounts to  $5.86 \text{ mm}$ . The blue, green, and red arrows, correspond to the  $x$ ,  $y$ , and  $z$  coordinate axes, respectively.

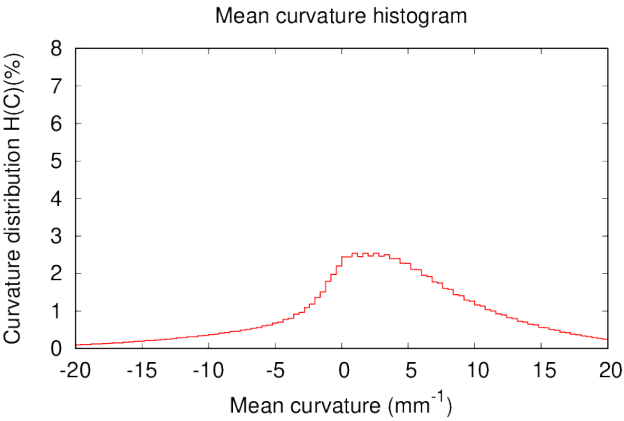

**Figure S58.** Mean curvature distribution on the whole image, from  $-20$  to  $+20 \text{ mm}^{-1}$ . Each bin is  $0.4 \text{ mm}^{-1}$  wide.

Image 3A

Table S32.

| Snow type | Image size (voxel) | Pixel size ( $\mu\text{m}$ ) | $\rho$ ( $\text{kg m}^{-3}$ ) | SSA ( $\text{m}^2 \text{kg}^{-1}$ ) | $d$ (mm) | $\overline{\text{MC}}$ ( $\text{mm}^{-1}$ ) | $\text{IQR}_{\text{MC}}$ ( $\text{mm}^{-1}$ ) |
|-----------|--------------------|------------------------------|-------------------------------|-------------------------------------|----------|---------------------------------------------|-----------------------------------------------|
| DH        | 700                | 8.400                        | 274.79                        | 18.18                               | 0.3600   | 2.65                                        | 8.52                                          |

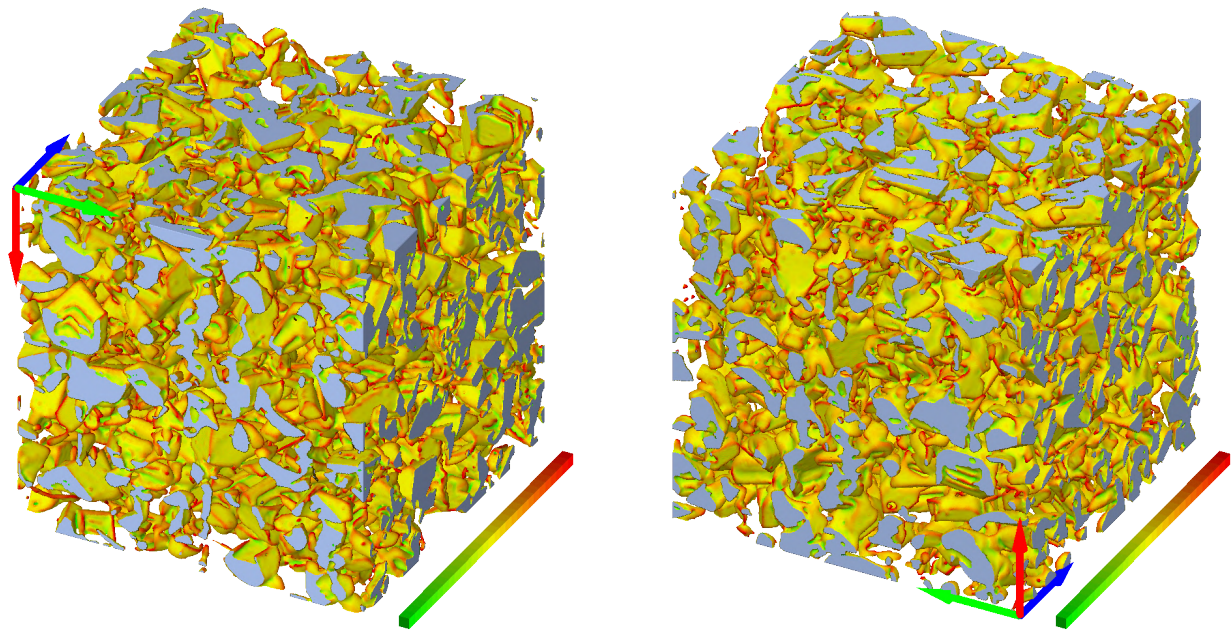

**Figure S59.** Downward (left) and upward (right) views of the whole image volume, where the mean local curvature is represented in each point of the surface. Concave surfaces are shown in green, convex surfaces in red, and flat surfaces in yellow (see colorbars from  $-30$  to  $+30 \text{ mm}^{-1}$ ). The side of each viewing cube amounts to  $5.88 \text{ mm}$ . The blue, green, and red arrows, correspond to the  $x$ ,  $y$ , and  $z$  coordinate axes, respectively.

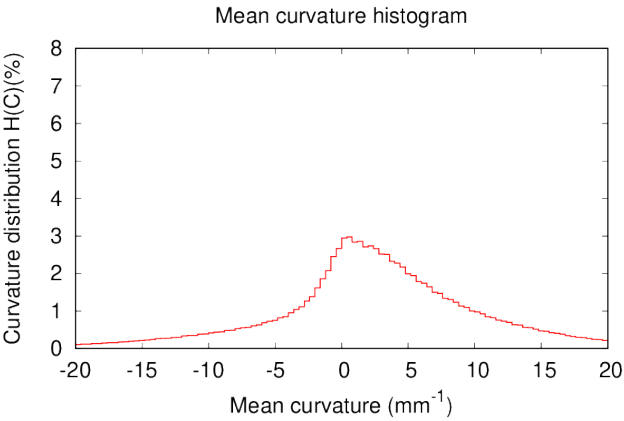

**Figure S60.** Mean curvature distribution on the whole image, from  $-20$  to  $+20 \text{ mm}^{-1}$ . Each bin is  $0.4 \text{ mm}^{-1}$  wide.

Image 4A

Table S33.

| Snow type | Image size (voxel) | Pixel size ( $\mu\text{m}$ ) | $\rho$ ( $\text{kg m}^{-3}$ ) | SSA ( $\text{m}^2 \text{kg}^{-1}$ ) | $d$ (mm) | $\overline{\text{MC}}$ ( $\text{mm}^{-1}$ ) | $\text{IQR}_{\text{MC}}$ ( $\text{mm}^{-1}$ ) |
|-----------|--------------------|------------------------------|-------------------------------|-------------------------------------|----------|---------------------------------------------|-----------------------------------------------|
| DH        | 700                | 8.397                        | 315.31                        | 15.19                               | 0.4309   | 1.34                                        | 7.61                                          |

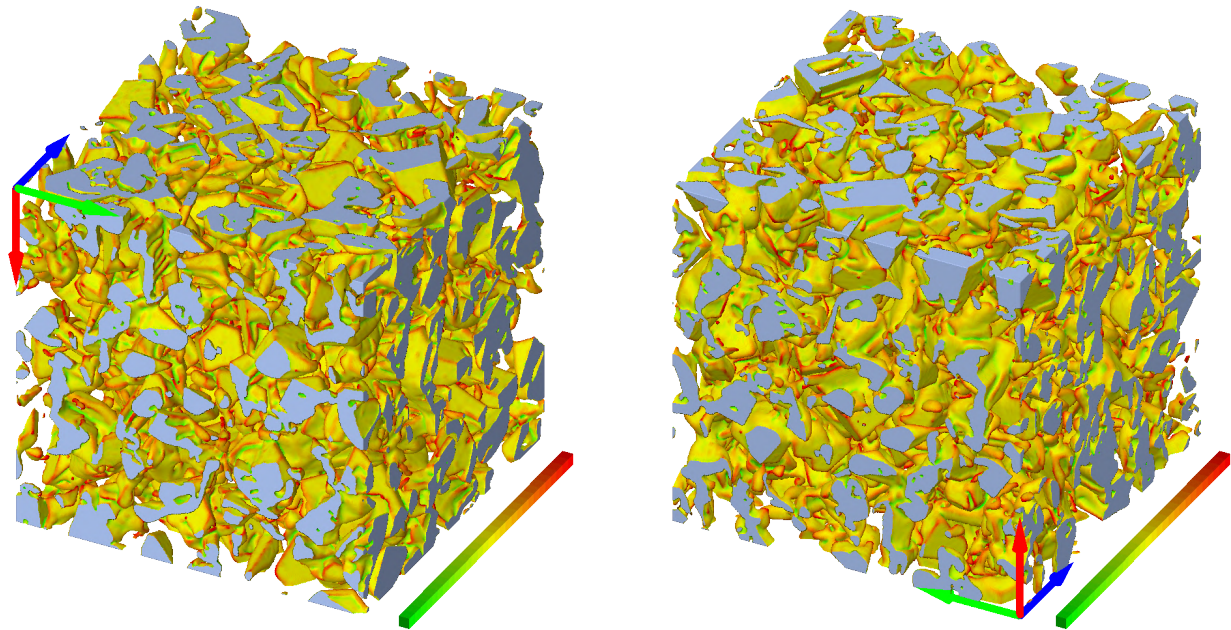

**Figure S61.** Downward (left) and upward (right) views of the whole image volume, where the mean local curvature is represented in each point of the surface. Concave surfaces are shown in green, convex surfaces in red, and flat surfaces in yellow (see colorbars from  $-30$  to  $+30 \text{ mm}^{-1}$ ). The side of each viewing cube amounts to  $5.88 \text{ mm}$ . The blue, green, and red arrows, correspond to the  $x$ ,  $y$ , and  $z$  coordinate axes, respectively.

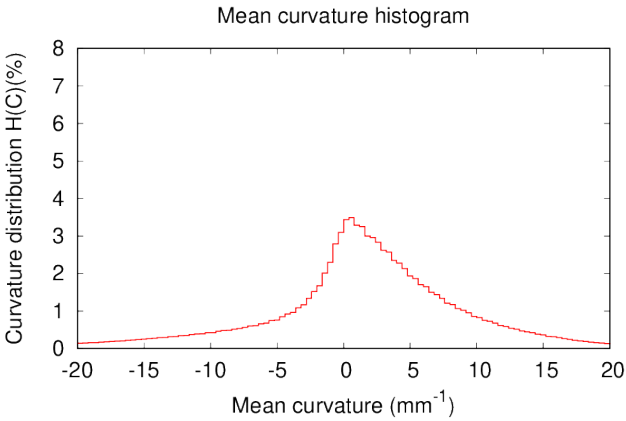

**Figure S62.** Mean curvature distribution on the whole image, from  $-20$  to  $+20 \text{ mm}^{-1}$ . Each bin is  $0.4 \text{ mm}^{-1}$  wide.



Image 5A

Table S34.

| Snow type | Image size (voxel) | Pixel size ( $\mu\text{m}$ ) | $\rho$ ( $\text{kg m}^{-3}$ ) | SSA ( $\text{m}^2 \text{kg}^{-1}$ ) | $d$ (mm) | $\overline{\text{MC}}$ ( $\text{mm}^{-1}$ ) | $\text{IQR}_{\text{MC}}$ ( $\text{mm}^{-1}$ ) |
|-----------|--------------------|------------------------------|-------------------------------|-------------------------------------|----------|---------------------------------------------|-----------------------------------------------|
| DH        | 1000               | 9.655                        | 286.12                        | 14.89                               | 0.4395   | 1.65                                        | 7.75                                          |

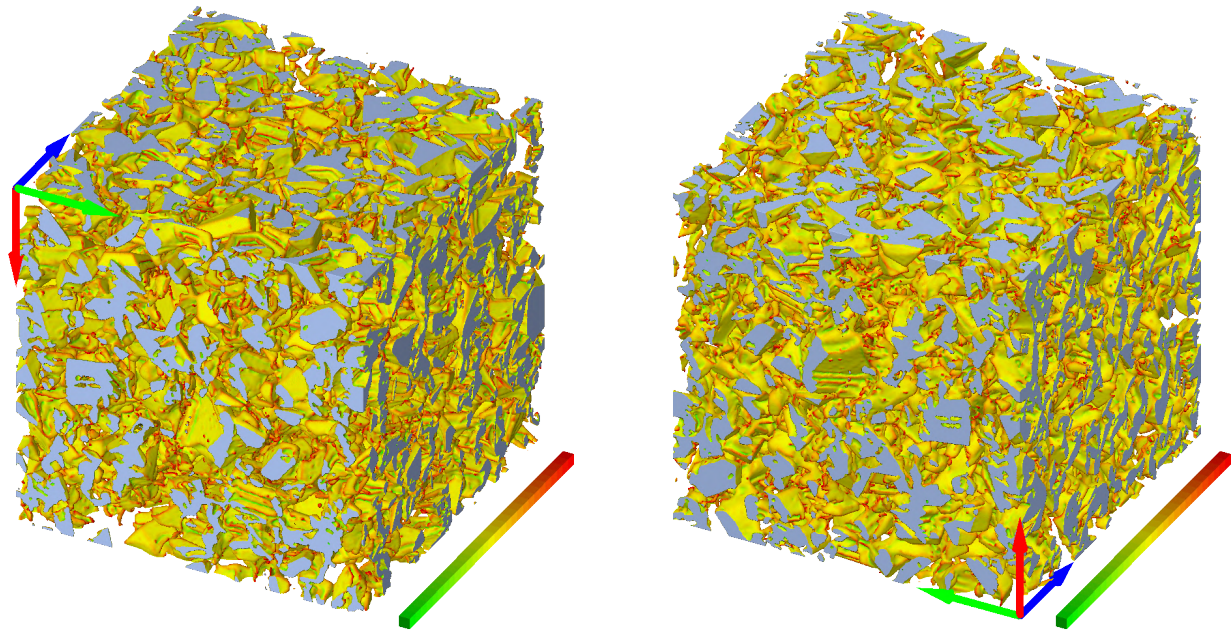

**Figure S63.** Downward (left) and upward (right) views of the whole image volume, where the mean local curvature is represented in each point of the surface. Concave surfaces are shown in green, convex surfaces in red, and flat surfaces in yellow (see colorbars from  $-30$  to  $+30 \text{ mm}^{-1}$ ). The side of each viewing cube amounts to  $9.66 \text{ mm}$ . The blue, green, and red arrows, correspond to the  $x$ ,  $y$ , and  $z$  coordinate axes, respectively.

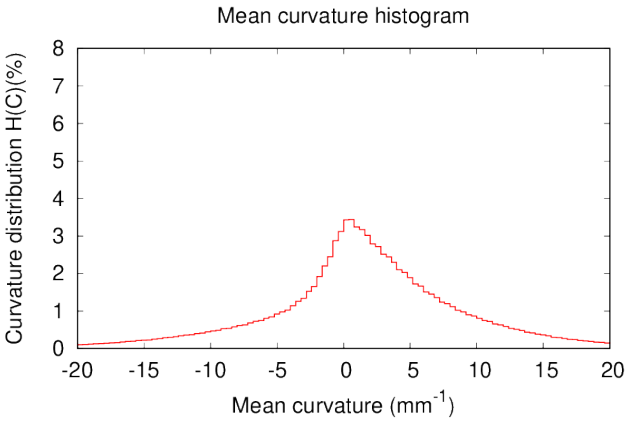

**Figure S64.** Mean curvature distribution on the whole image, from  $-20$  to  $+20 \text{ mm}^{-1}$ . Each bin is  $0.4 \text{ mm}^{-1}$  wide.

Image 7A

Table S35.

| Snow type | Image size (voxel) | Pixel size ( $\mu\text{m}$ ) | $\rho$ ( $\text{kg m}^{-3}$ ) | SSA ( $\text{m}^2 \text{kg}^{-1}$ ) | $d$ (mm) | $\overline{\text{MC}}$ ( $\text{mm}^{-1}$ ) | $\text{IQR}_{\text{MC}}$ ( $\text{mm}^{-1}$ ) |
|-----------|--------------------|------------------------------|-------------------------------|-------------------------------------|----------|---------------------------------------------|-----------------------------------------------|
| DH        | 950                | 9.672                        | 309.95                        | 13.42                               | 0.4882   | 1.05                                        | 7.87                                          |

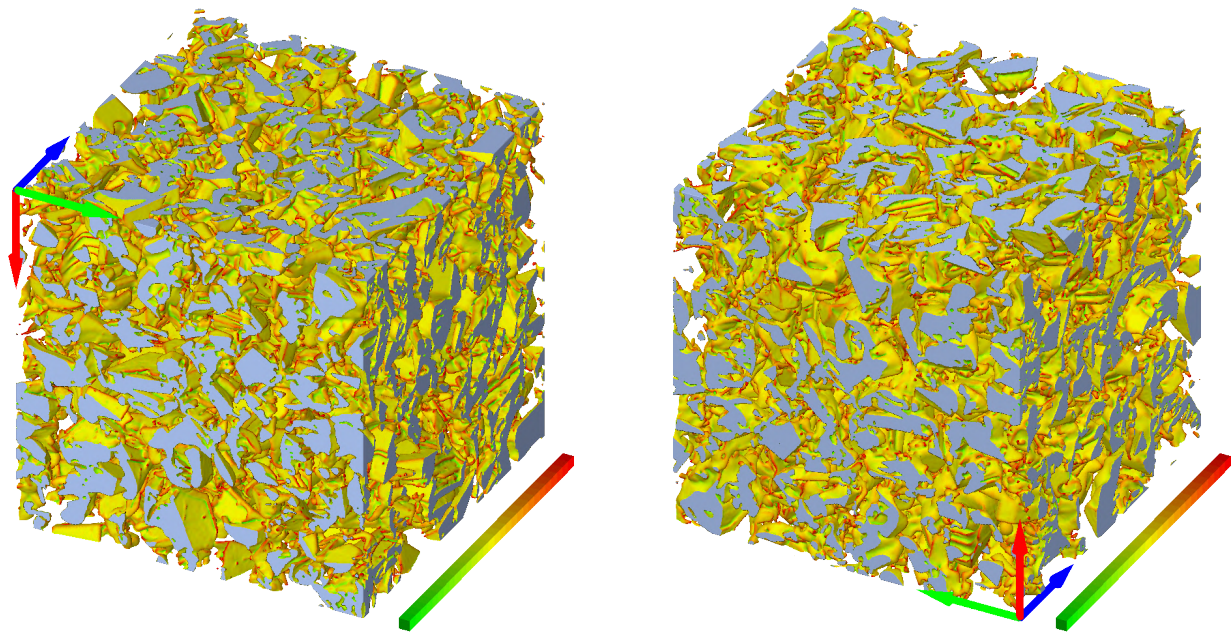

**Figure S65.** Downward (left) and upward (right) views of the whole image volume, where the mean local curvature is represented in each point of the surface. Concave surfaces are shown in green, convex surfaces in red, and flat surfaces in yellow (see colorbars from  $-30$  to  $+30 \text{ mm}^{-1}$ ). The side of each viewing cube amounts to  $9.19 \text{ mm}$ . The blue, green, and red arrows, correspond to the  $x$ ,  $y$ , and  $z$  coordinate axes, respectively.

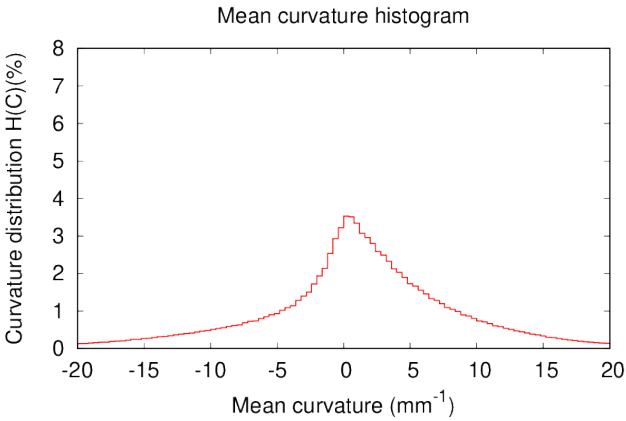

**Figure S66.** Mean curvature distribution on the whole image, from  $-20$  to  $+20 \text{ mm}^{-1}$ . Each bin is  $0.4 \text{ mm}^{-1}$  wide.



Table S36.

| Snow type | Image size (voxel) | Pixel size ( $\mu\text{m}$ ) | $\rho$ ( $\text{kg m}^{-3}$ ) | SSA ( $\text{m}^2 \text{kg}^{-1}$ ) | $d$ (mm) | $\overline{\text{MC}}$ ( $\text{mm}^{-1}$ ) | $\text{IQR}_{\text{MC}}$ ( $\text{mm}^{-1}$ ) |
|-----------|--------------------|------------------------------|-------------------------------|-------------------------------------|----------|---------------------------------------------|-----------------------------------------------|
| DH        | 600                | 10.000                       | 369.20                        | 21.84                               | 0.2996   | 0.76                                        | 11.32                                         |

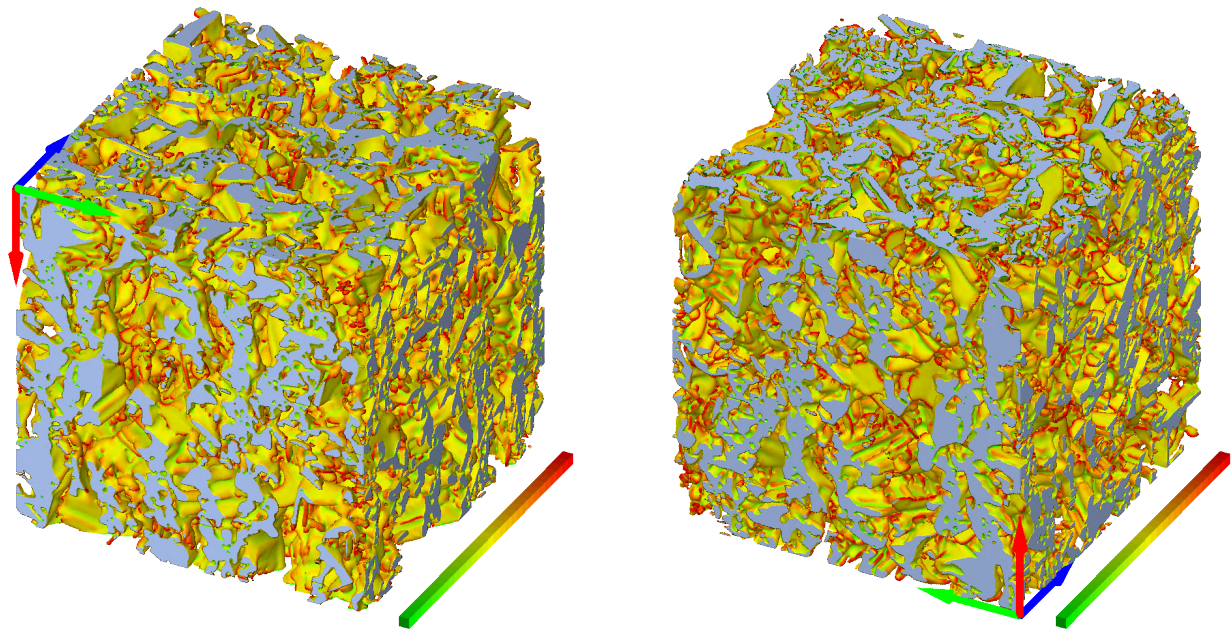

**Figure S67.** Downward (left) and upward (right) views of the whole image volume, where the mean local curvature is represented in each point of the surface. Concave surfaces are shown in green, convex surfaces in red, and flat surfaces in yellow (see colorbars from  $-30$  to  $+30 \text{ mm}^{-1}$ ). The side of each viewing cube amounts to  $6.00 \text{ mm}$ . The blue, green, and red arrows, correspond to the  $x$ ,  $y$ , and  $z$  coordinate axes, respectively.

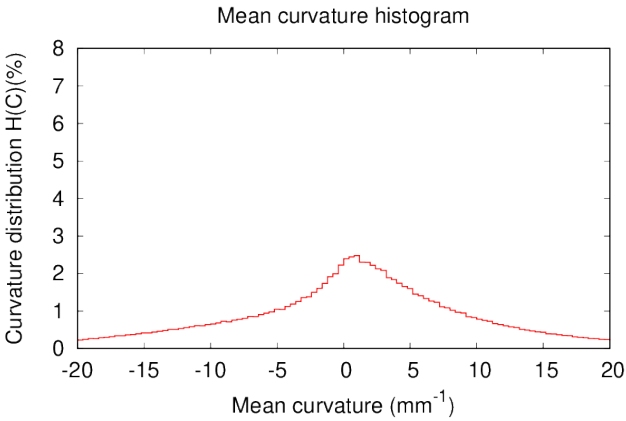

**Figure S68.** Mean curvature distribution on the whole image, from  $-20$  to  $+20 \text{ mm}^{-1}$ . Each bin is  $0.4 \text{ mm}^{-1}$  wide.

## References

- Calonne, N., Flin, F., Morin, S., Lesaffre, B., Rolland du Roscoat, S., and Geindreau, C.: Numerical and experimental investigations of the effective thermal conductivity of snow, *Geophys. Res. Lett.*, 38, L23 501, <https://doi.org/10.1029/2011GL049234>, 2011.
- Calonne, N., Flin, F., Geindreau, C., Lesaffre, B., and Rolland du Roscoat, S.: Study of a temperature gradient metamorphism of snow from 3-D images: time evolution of microstructures, physical properties and their associated anisotropy, *The Cryosphere*, 8, 2255–2274, <https://doi.org/10.5194/tc-8-2255-2014>, 2014.
- Coléou, C., Lesaffre, B., Brzoska, J.-B., Ludwig, W., and Boller, E.: Three-dimensional snow images by X-ray microtomography, *Annals of Glaciology*, 32, 75–81, <https://doi.org/10.3189/172756401781819418>, 2001.
- Fierz, C., Armstrong, R. L., Durand, Y., Etchevers, P., Greene, E., McClung, D. M., Nishimura, K., Satyawali, P. K., and Sokratov, S. A.: The international classification for seasonal snow on the ground, IHP-VII Technical Documents in Hydrology, IACS Contribution n° 1, 83, <https://unesdoc.unesco.org/ark:/48223/pf0000186462>, 2009.
- Flin, F. and Brzoska, J.-B.: The temperature gradient metamorphism of snow: vapour diffusion model and application to tomographic images, *Ann. Glaciol.*, 49, 17–21, <https://doi.org/10.3189/172756408787814834>, 2008.
- Flin, F., Brzoska, J.-B., Lesaffre, B., Coléou, C., and Pieritz, R. A.: Three-dimensional geometric measurements of snow microstructural evolution under isothermal conditions, *Annals of Glaciology*, 38, 39–44, <https://doi.org/10.3189/172756404781814942>, 2004.
- Flin, F., Lesaffre, B., Dufour, A., Gillibert, L., Hasan, A., Rolland du Roscoat, S., Cabanes, S., and Pugliese, P.: On the computations of specific surface area and specific grain contact area from snow 3D images, in: *Physics and Chemistry of Ice*, edited by Y. Furukawa, pp. 321–328, Hokkaido University Press, Sapporo, Japan, [https://frederic-flin.github.io/pdf/flin\\_2011\\_ssa\\_sgca.pdf](https://frederic-flin.github.io/pdf/flin_2011_ssa_sgca.pdf), 2011.
