# Supplementary material
Source: Copernicus journal article supplement (doi:10.5194/tc-20-2923-2026)
Supplement: Supplementary file 3 [file Supplement3_Computed_Data.pdf › Supplement3_Computed_Data.pdf]

# Supplement of “Simulating liquid water distribution at the pore scale in snow: water retention curves and effective transport properties”

Lisa Bouvet<sup>1,2</sup>, Nicolas Allet<sup>1,2</sup>, Neige Calonne<sup>1</sup>, Frédéric Flin<sup>1</sup>, and Christian Geindreau<sup>2</sup>

<sup>1</sup>Univ. Grenoble Alpes, Université de Toulouse, Météo-France, CNRS, CNRM, Centre d’Études de la Neige, Grenoble, France

<sup>2</sup>Université Grenoble Alpes, CNRS, Grenoble INP, 3SR, Grenoble, France

## Description

The folder ‘Supplement\_data’ contains 7 .csv files gathering the data presented in this study:

- **drainage.csv** The computed values of liquid pressure head  $h$  (m) and water content  $\theta_w$  (-) during drainage simulations for each snow sample.
- 5    – **imbibition.csv** The computed values of liquid pressure head  $h$  (m) and water content  $\theta_w$  (-) during imbibition simulations for each snow sample.
- **VGparameters\_drainage.csv** The values of the VG parameters deduced from the drainage simulations for each snow sample, including  $\alpha_{VG}$  ( $m^{-1}$ ),  $n_{VG}$  (-),  $\theta_r$  (-),  $\rho$  ( $kg\ m^{-3}$ ),  $d$  (m) and  $IQR_{MC}$  ( $mm^{-1}$ ).
- **VGparameters\_imbibition.csv** The values of the VG parameters deduced from the imbibition simulations for each  
10    snow sample, including  $\alpha_{VG}$  ( $m^{-1}$ ),  $n_{VG}$  (-),  $\rho$  ( $kg\ m^{-3}$ ),  $d$  (m) and  $IQR_{MC}$  ( $mm^{-1}$ ).
- **conductivity\_drainage.csv** The computed effective conductivity ( $W\ m^{-1}\ K^{-1}$ ) for each snow sample and each water content  $\theta_w$  (-).
- **water\_permeability\_drainage.csv** The computed effective water permeability ( $m^2$ ) for each snow sample and each water content  $\theta_w$  (-).
- 15    – **diffusivity\_drainage.csv** The computed effective diffusivity (-) for each snow sample and each water content  $\theta_w$  (-).
