# Supplementary material
Source: Copernicus journal article supplement (doi:10.5194/tc-20-2923-2026)
Supplement: Supplementary file [file tc-20-2923-2026-supplement-title-page.pdf › tc-20-2923-2026-supplement-title-page.pdf]

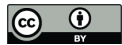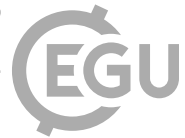

## *Supplement of*

# **Simulating liquid water distribution at the pore scale in snow: water retention curves and effective transport properties**

**Lisa Bouvet et al.**

*Correspondence to:* Lisa Bouvet ([lisa.bouvet@meteo.fr](mailto:lisa.bouvet@meteo.fr)) and Frédéric Flin ([frederic.flin@meteo.fr](mailto:frederic.flin@meteo.fr))

- [tc-20-2923-2026-supplement-title-page.pdf](#)
- [Supplement1\\_Images\\_Description\\_compressed.pdf](#)
- [Supplement2\\_Boundary\\_Equations.pdf](#)
- [Supplement3\\_Computed\\_Data.pdf](#)

The copyright of individual parts of the supplement might differ from the article licence.
